# Supplementary material for: Open-[60]fullerenols with water adsorbed both inside and outside
Source: Royal Society of Chemistry journal article supplement (doi:10.1039/d3cc05542f), 2024-01-01
Supplement: d3cc05542f1.pdf [file d3cc05542f1.pdf]

## Supporting Information

### Open-[60]fullerenols with water adsorbed both inside and outside

Yoshifumi Hashikawa,<sup>1\*</sup> Shumpei Sadai,<sup>1</sup> Yuka Ikemoto,<sup>2</sup> and Yasujiro Murata<sup>1\*</sup>

<sup>1</sup>*Institute for Chemical Research, Kyoto University, Uji, Kyoto 611-0011, Japan*

<sup>2</sup>*Japan Synchrotron Radiation Research Institute, Sayo-gun, Hyogo 679-5198, Japan*

*Fax: (+81)774-38-3178*

*E-mail: hashi@scl.kyoto-u.ac.jp*

*yasujiro@scl.kyoto-u.ac.jp*

## Contents

|                                                                         |     |
|-------------------------------------------------------------------------|-----|
| 1. General                                                              | S3  |
| 2. Computational Methods                                                | S3  |
| 3. IR Spectra                                                           | S4  |
| 4. DFT Calculations                                                     | S8  |
| 4.1. Simulated IR Spectra of <b>1–3</b>                                 | S8  |
| 4.2. Topological Analysis of H <sub>2</sub> O@ <b>1</b>                 | S13 |
| 4.3. Gas-Phase Acidity                                                  | S16 |
| 4.4. Simulated IR Spectra of <b>1</b> •(H <sub>2</sub> O) <sub>39</sub> | S20 |
| 5. Microscope Images                                                    | S33 |
| 6. References                                                           | S34 |

## 1. General

Fullerene C<sub>60</sub> was purchased from SES Research Co. Compounds H<sub>2</sub>O@1–3 and 1 were synthesized according to literature procedures.<sup>1</sup> The powdery samples were obtained from evaporation of corresponding CS<sub>2</sub> or toluene solutions.

IR measurements were carried out at SPring-8 (BL43IR). Prior to measurements, the powdery samples were pressed by two BaF<sub>2</sub> disks and the samples attached on the disk was used for the measurements. The powder shapes were confirmed by microscopy.

## 2. Computational Methods

All calculations were conducted using the Gaussian 09 program. All structures at the stationary states were optimized at the B3LYP-D3/6-31G(d,p) level of theory without any symmetry assumptions and confirmed by the frequency analyses at the same level of theory. For hydrogen halides, effective core potentials were incorporated in the calculations at the B3LYP-D3 level of theory with basis sets of LanL2DZ for halogens and 6-31G(d,p) for the rest.

Using the geometries optimized at the B3LYP-D3/6-31G(d,p) level of theory, natural bond orbital (NBO) analyses were performed at the same level of theory. The atoms-in-molecules (AIM) analyses and reduced density gradient (RDG) isosurface analyses were conducted by the use of Multiwfn<sup>2</sup> and the results were visualized by VMD.<sup>3</sup>

### 3. IR Spectra

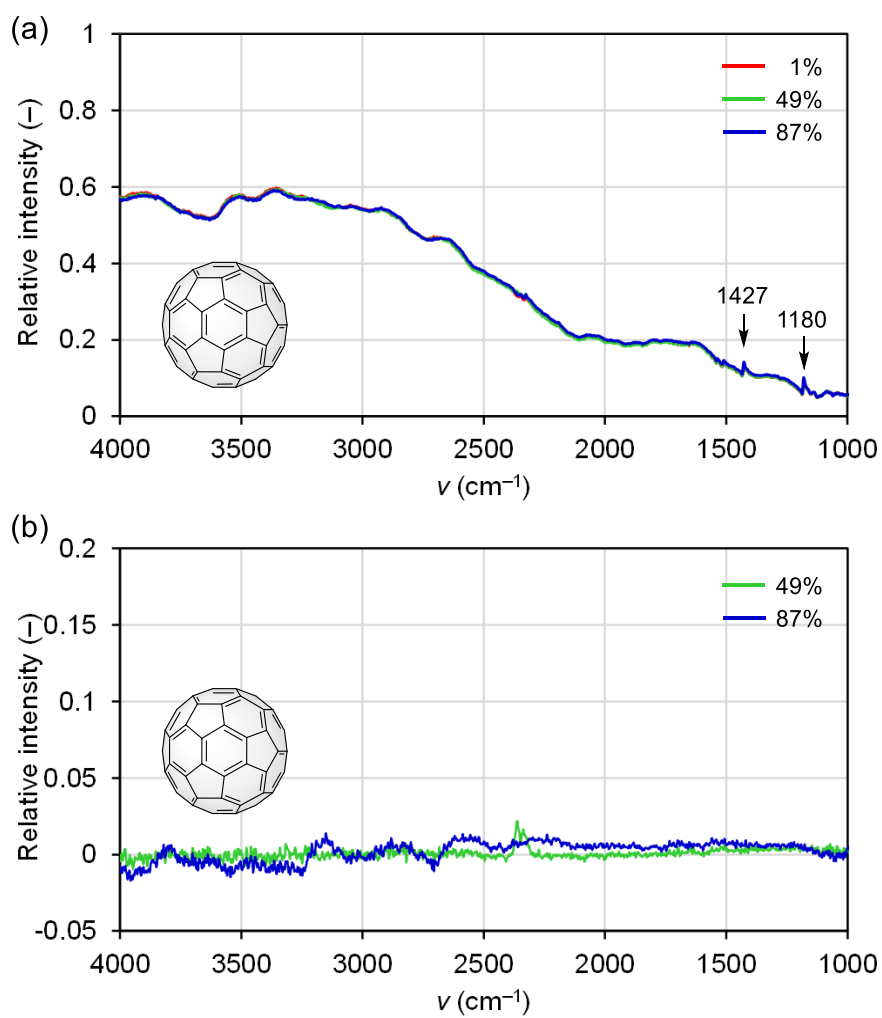

**Figure S1.** (a) Original and (b) differential IR spectra of C<sub>60</sub> at variable relative humidities.

Though the spectral feature of H<sub>2</sub>O@**1** (Figure S2) showed close resemblance to that of **1** (Figure 2), both OH stretching modes became sharpened. Likewise, the band observed at 1261 cm<sup>-1</sup> became sharpened. This band was assigned to be a C–OH stretching mode adjacent to carbonyl **b** (1288 cm<sup>-1</sup>) according to theoretical calculations (Figure S8). Furthermore, the vibration band of carbonyl **b** became broadened. These feature strongly supports that the encapsulated H<sub>2</sub>O is adsorbed from inside toward the central oxygen in the bis(hemiketal) moiety through a hydrogen-bonding.

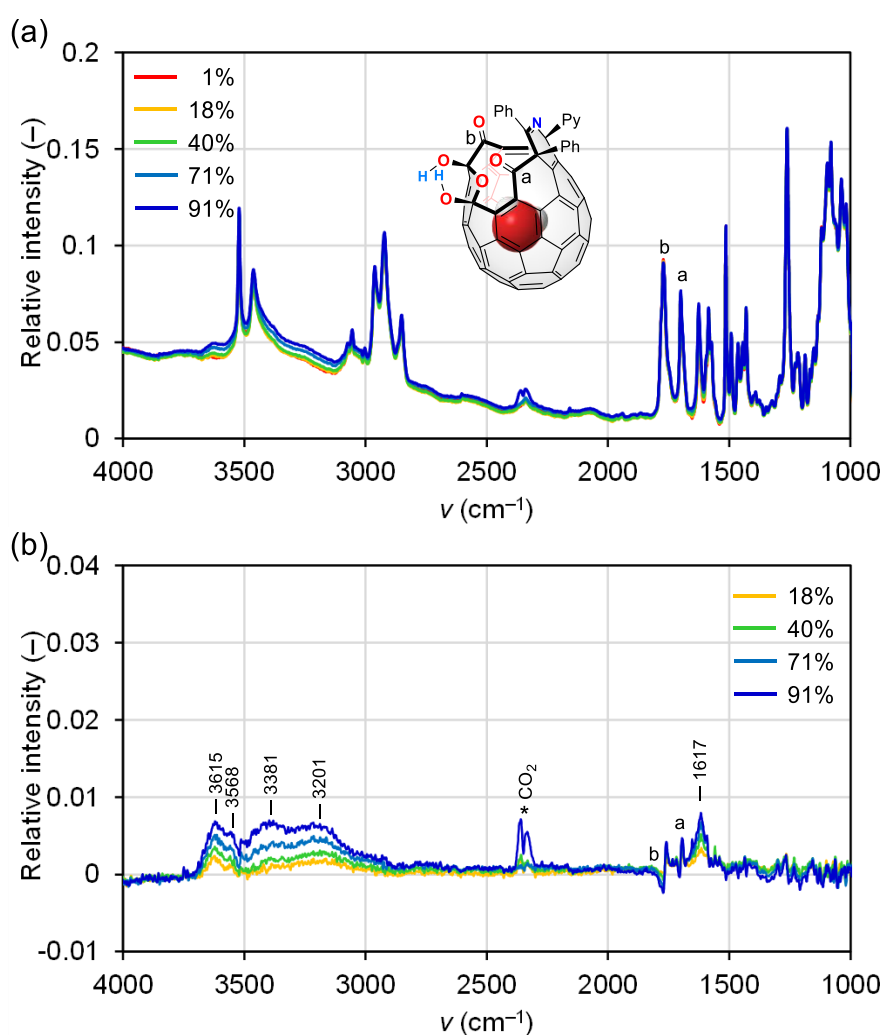

**Figure S2.** (a) Original and (b) differential IR spectra of H<sub>2</sub>O@**1** at variable relative humidities.

For [60]fullerenol **1**, carbonyl **b** is largely influenced by adsorbed water while carbonyl **a** has a larger influence in **2** upon water adsorption. The structural difference is only one substituent, OH (for **1**) or H (for **2**), at the same locant. Considering the significant decrease in relative amount of adsorbed water for **2** compared to **1**, carbonyl groups **a** and **b** are considered to play a secondary role for water adsorption whereas each carbonyl group has a different effect on water adsorption depending presumably upon their surrounding stereoenvironment as well as distance to hydroxy groups which should be an actual initiator for the adsorption event.

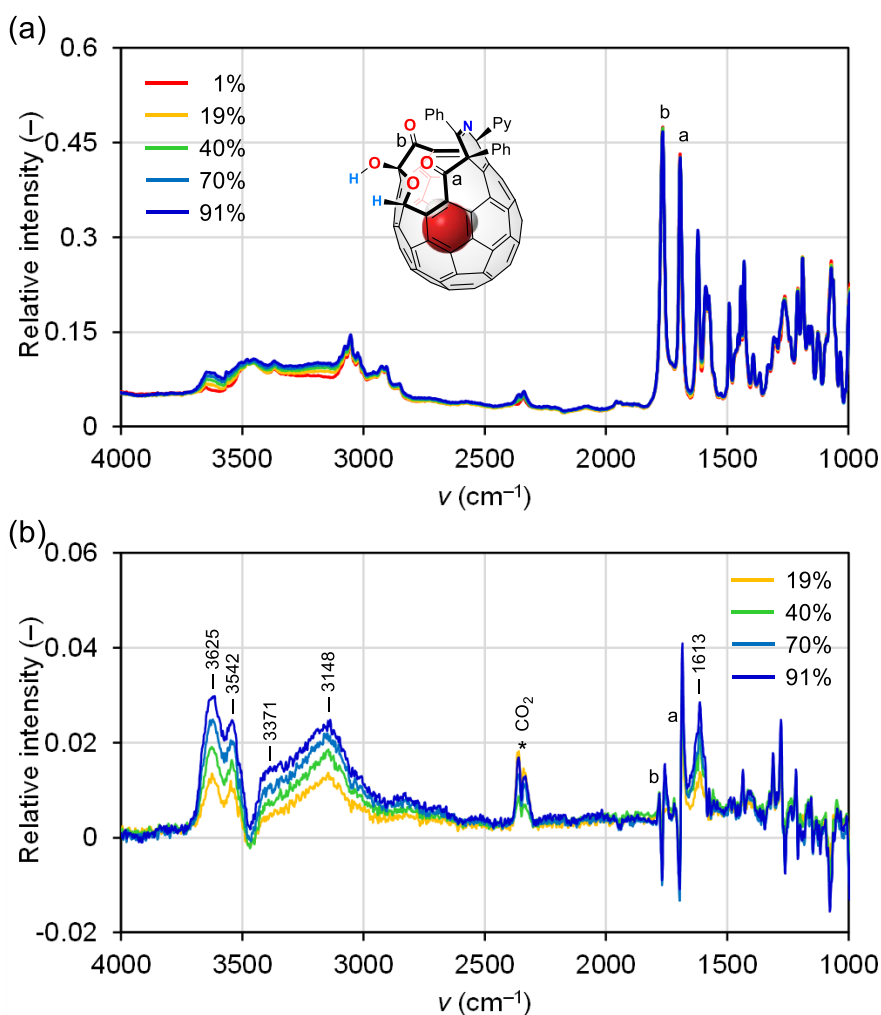

**Figure S3.** (a) Original and (b) differential IR spectra of H<sub>2</sub>O@**2** at variable relative humidities.

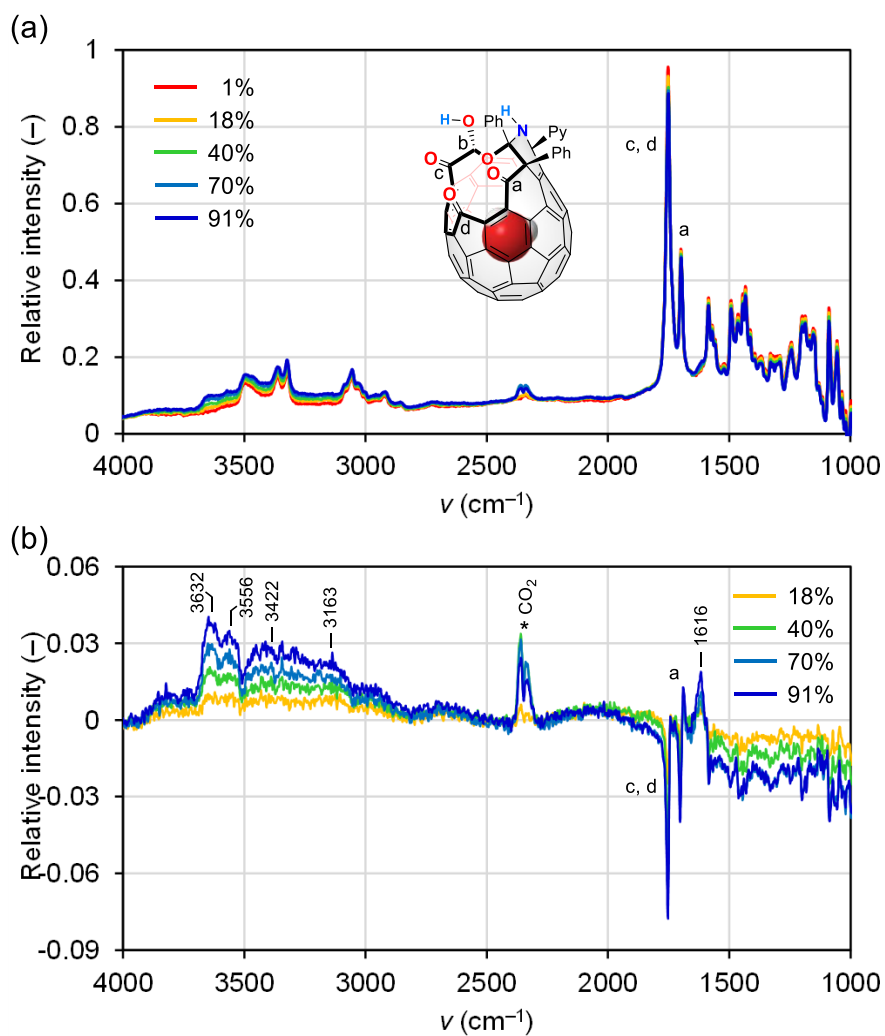

**Figure S4.** (a) Original and (b) differential IR spectra of H<sub>2</sub>O@3 at variable relative humidities.

## 4. DFT Calculations

### 4.1. Simulated IR Spectra of 1–3

The remained sharpness in the spectral feature for OH stretching modes of hydroxy substituents (Figures S2–4) indicates that the free form of [60]fullerenol still exists even at high RHs. In other words, water adsorption is favored on already-wetted surface of [60]fullerenols than dry surface. Therefore, the spectra are obtained as a results of an average between the two states, i.e., dry and wet [60]fullerenols. As shown in Figure S5, under dry conditions, **1** shows OH stretching modes at 3743 and 3665  $\text{cm}^{-1}$  while under wet conditions, they are shifted to 2041 and 1995  $\text{cm}^{-1}$  (Figure S11). If all molecules of [60]fullerenol adsorbs water, significant broadening of the bands would be expected.

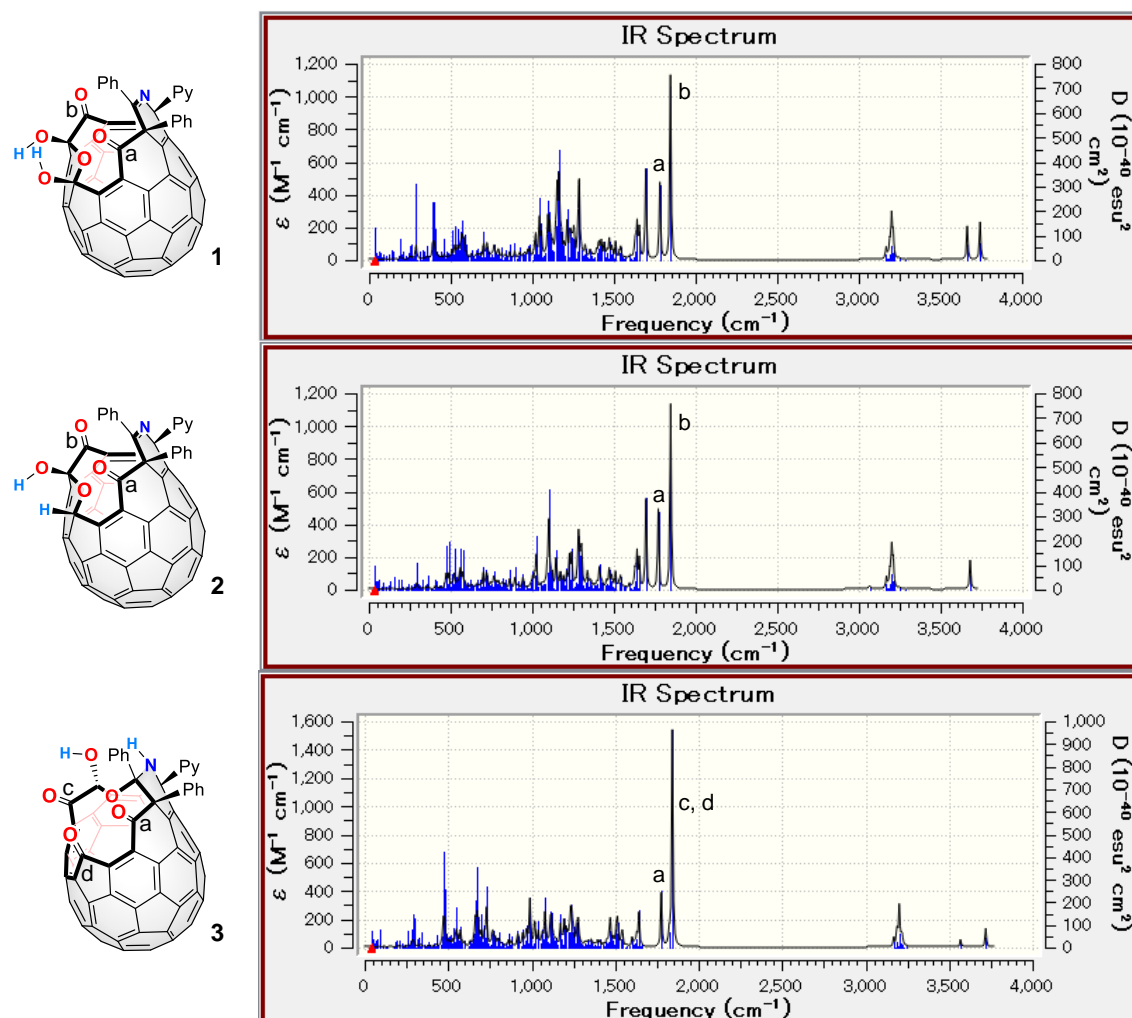

**Figure S5.** Simulated IR spectra of **1–3** (B3LYP-D3/6-31G(d,p)).



**Table S1.** Optimized structure of **1** (B3LYP-D3/6-31G(d,p))

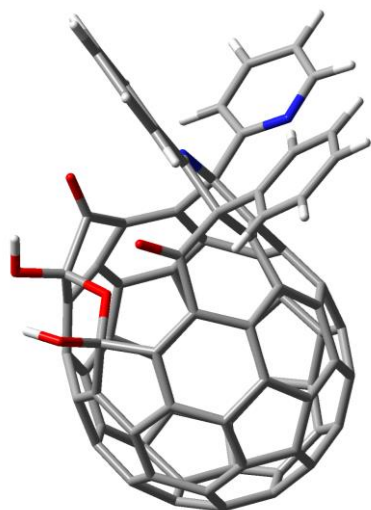

Standard orientation:

| Center Number | Atomic Number | Atomic Type | Coordinates (Angstroms) |           |           |
|---------------|---------------|-------------|-------------------------|-----------|-----------|
|               |               |             | X                       | Y         | Z         |
| 1             | 6             | 0           | 3.705128                | 2.733308  | 1.642289  |
| 2             | 6             | 0           | 2.292176                | 3.005813  | 1.845513  |
| 3             | 6             | 0           | 1.572907                | 2.248265  | 2.755381  |
| 4             | 6             | 0           | 2.213341                | 1.171993  | 3.491125  |
| 5             | 6             | 0           | 3.558509                | 0.880274  | 3.268572  |
| 6             | 6             | 0           | 4.320358                | 1.679512  | 2.323523  |
| 7             | 6             | 0           | 1.693323                | 3.361299  | 0.571895  |
| 8             | 6             | 0           | 0.230453                | 1.848678  | 2.429626  |
| 9             | 6             | 0           | 1.243038                | 0.106603  | 3.612026  |
| 10            | 6             | 0           | 3.981337                | -0.503335 | 3.137228  |
| 11            | 6             | 0           | 5.221529                | 0.789573  | 1.611428  |
| 12            | 6             | 0           | 4.000292                | 2.970397  | 0.245481  |
| 13            | 6             | 0           | 3.038086                | -1.530139 | 3.245552  |
| 14            | 6             | 0           | 1.642558                | -1.218913 | 3.495863  |
| 15            | 6             | 0           | 3.072721                | -2.644878 | 2.319230  |
| 16            | 6             | 0           | 0.815701                | -2.135407 | 2.736985  |
| 17            | 6             | 0           | 0.392203                | 2.940018  | 0.219484  |
| 18            | 6             | 0           | 0.009836                | 0.529590  | 2.984605  |
| 19            | 6             | 0           | 1.703011                | -3.006790 | 2.012312  |
| 20            | 6             | 0           | -0.844922               | -0.360110 | 2.337345  |
| 21            | 6             | 0           | -0.372815               | 2.196913  | 1.215574  |
| 22            | 6             | 0           | 4.999632                | -0.560990 | 2.103360  |
| 23            | 6             | 0           | 5.493977                | 1.006329  | 0.258975  |
| 24            | 6             | 0           | 0.100182                | 2.641103  | -1.193818 |
| 25            | 6             | 0           | 4.889640                | 2.130912  | -0.435916 |
| 26            | 6             | 0           | 2.773471                | 3.396598  | -0.398867 |
| 27            | 6             | 0           | 5.536197                | -0.115413 | -0.663253 |
| 28            | 6             | 0           | 4.595187                | 1.718891  | -1.793443 |
| 29            | 6             | 0           | 2.519508                | 3.045939  | -1.713380 |
| 30            | 6             | 0           | -0.411231               | -1.746491 | 2.169424  |
| 31            | 6             | 0           | 5.030983                | -1.639344 | 1.211843  |
| 32            | 6             | 0           | -1.496415               | 1.402386  | 0.792019  |
| 33            | 6             | 0           | 4.966178                | 0.317381  | -1.925362 |

|    |   |   |           |           |           |
|----|---|---|-----------|-----------|-----------|
| 34 | 6 | 0 | 3.453197  | 2.193477  | -2.434445 |
| 35 | 6 | 0 | 1.175545  | 2.691052  | -2.102454 |
| 36 | 6 | 0 | 1.288261  | 1.689747  | -3.130524 |
| 37 | 6 | 0 | -1.067665 | 1.831507  | -1.535194 |
| 38 | 6 | 0 | -1.756490 | 0.183809  | 1.355208  |
| 39 | 6 | 0 | -2.225389 | -2.081694 | 0.430310  |
| 40 | 6 | 0 | 2.663822  | 1.312150  | -3.266612 |
| 41 | 6 | 0 | 2.971209  | -0.052196 | -3.329354 |
| 42 | 6 | 0 | 1.930202  | -1.061166 | -3.296055 |
| 43 | 6 | 0 | 4.140188  | -0.548373 | -2.646932 |
| 44 | 6 | 0 | 4.039102  | -2.690483 | 1.316016  |
| 45 | 6 | 0 | -1.723755 | -0.321922 | -2.962238 |
| 46 | 6 | 0 | 5.290442  | -1.407212 | -0.200694 |
| 47 | 6 | 0 | 4.435579  | -2.301256 | -0.963232 |
| 48 | 6 | 0 | -0.970665 | 0.917474  | -2.575656 |
| 49 | 6 | 0 | -0.861043 | -2.394992 | 0.953887  |
| 50 | 6 | 0 | 0.067271  | -3.095804 | 0.191821  |
| 51 | 6 | 0 | 0.298573  | 0.730582  | -3.238544 |
| 52 | 6 | 0 | 0.614313  | -0.662076 | -3.413821 |
| 53 | 6 | 0 | 3.829923  | -1.869040 | -2.143678 |
| 54 | 6 | 0 | 2.442966  | -2.194405 | -2.471798 |
| 55 | 6 | 0 | -0.624508 | -1.442913 | -3.066059 |
| 56 | 6 | 0 | 3.669254  | -3.084526 | -0.036521 |
| 57 | 6 | 0 | 1.352239  | -3.378637 | 0.713540  |
| 58 | 6 | 0 | 0.158866  | -3.078429 | -1.356452 |
| 59 | 6 | 0 | 2.342321  | -3.376354 | -0.344565 |
| 60 | 6 | 0 | 1.710637  | -2.961249 | -1.571386 |
| 61 | 6 | 0 | -2.196179 | 1.811150  | -0.489468 |
| 62 | 6 | 0 | -2.873135 | -0.728287 | 0.880395  |
| 63 | 6 | 0 | -3.657609 | -0.106081 | -0.304199 |
| 64 | 7 | 0 | -3.288344 | 0.964791  | -0.900881 |
| 65 | 6 | 0 | -3.789038 | -0.914060 | 2.112544  |
| 66 | 6 | 0 | -2.855248 | 3.198942  | -0.318637 |
| 67 | 8 | 0 | -2.815765 | -2.880248 | -0.267946 |
| 68 | 8 | 0 | -2.861733 | -0.538945 | -3.300966 |
| 69 | 6 | 0 | -2.901095 | 4.133751  | -1.354649 |
| 70 | 6 | 0 | -3.576185 | 5.333607  | -1.139215 |
| 71 | 6 | 0 | -4.183794 | 5.552553  | 0.096224  |
| 72 | 6 | 0 | -4.092967 | 4.549105  | 1.061441  |
| 73 | 7 | 0 | -3.446267 | 3.394920  | 0.865781  |
| 74 | 6 | 0 | -4.494280 | 0.206683  | 2.571379  |
| 75 | 6 | 0 | -5.303452 | 0.110767  | 3.701511  |
| 76 | 6 | 0 | -5.408418 | -1.097883 | 4.393614  |
| 77 | 6 | 0 | -4.694688 | -2.210235 | 3.948525  |
| 78 | 6 | 0 | -3.886223 | -2.119709 | 2.813894  |
| 79 | 8 | 0 | -0.556053 | -1.900712 | -1.720743 |
| 80 | 8 | 0 | -0.974039 | -2.428794 | -3.980298 |
| 81 | 8 | 0 | -0.367672 | -4.236420 | -1.916595 |
| 82 | 6 | 0 | -4.918357 | -0.727688 | -0.823376 |
| 83 | 6 | 0 | -5.524770 | -1.868158 | -0.273408 |
| 84 | 6 | 0 | -6.718947 | -2.364792 | -0.793167 |
| 85 | 6 | 0 | -7.333330 | -1.739253 | -1.876534 |
| 86 | 6 | 0 | -6.739535 | -0.606596 | -2.438734 |
| 87 | 6 | 0 | -5.552648 | -0.106134 | -1.917345 |
| 88 | 1 | 0 | -2.420096 | 3.923232  | -2.302969 |
| 89 | 1 | 0 | -3.626926 | 6.083092  | -1.923390 |
| 90 | 1 | 0 | -4.717811 | 6.472713  | 0.309104  |
| 91 | 1 | 0 | -4.559371 | 4.675696  | 2.036266  |
| 92 | 1 | 0 | -4.390824 | 1.155699  | 2.051038  |
| 93 | 1 | 0 | -5.850180 | 0.984372  | 4.044198  |

|    |   |   |           |           |           |     |   |   |           |           |           |
|----|---|---|-----------|-----------|-----------|-----|---|---|-----------|-----------|-----------|
| 94 | 1 | 0 | -6.038966 | -1.170742 | 5.274654  | 100 | 1 | 0 | -7.165188 | -3.248262 | -0.346402 |
| 95 | 1 | 0 | -4.765969 | -3.154321 | 4.480485  | 101 | 1 | 0 | -8.263252 | -2.129784 | -2.280341 |
| 96 | 1 | 0 | -3.351951 | -2.999426 | 2.470430  | 102 | 1 | 0 | -7.202679 | -0.111253 | -3.287248 |
| 97 | 1 | 0 | -1.948377 | -2.485373 | -3.939865 | 103 | 1 | 0 | -5.084490 | 0.765777  | -2.353618 |
| 98 | 1 | 0 | -0.380635 | -4.100208 | -2.878061 |     |   |   |           |           |           |
| 99 | 1 | 0 | -5.072377 | -2.386535 | 0.555915  |     |   |   |           |           |           |

The total electronic energy was calculated to be -3543.7628178 Hartree.

**Table S2.** Optimized structure of **2** (B3LYP-D3/6-31G(d,p))

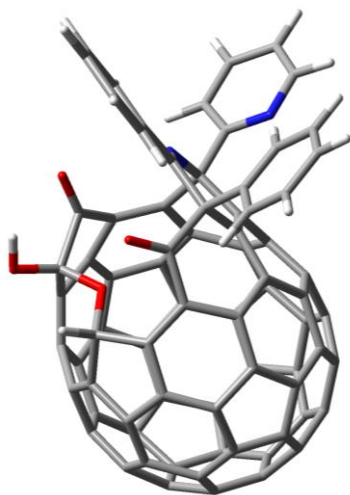

Standard orientation:

| Center Number | Atomic Number | Atomic Type | Coordinates (Angstroms) |           |           |
|---------------|---------------|-------------|-------------------------|-----------|-----------|
|               |               |             | X                       | Y         | Z         |
| 1             | 6             | 0           | -3.690269               | 1.815078  | -2.549235 |
| 2             | 6             | 0           | -2.276232               | 1.979295  | -2.841977 |
| 3             | 6             | 0           | -1.559271               | 0.918977  | -3.372064 |
| 4             | 6             | 0           | -2.202929               | -0.359930 | -3.618074 |
| 5             | 6             | 0           | -3.549010               | -0.534445 | -3.299735 |
| 6             | 6             | 0           | -4.308490               | 0.578069  | -2.753464 |
| 7             | 6             | 0           | -1.676938               | 2.812650  | -1.815343 |
| 8             | 6             | 0           | -0.219361               | 0.678013  | -2.909741 |
| 9             | 6             | 0           | -1.236502               | -1.388024 | -3.301801 |
| 10            | 6             | 0           | -3.975449               | -1.749216 | -2.626906 |
| 11            | 6             | 0           | -5.211982               | 0.048987  | -1.746394 |
| 12            | 6             | 0           | -3.985286               | 2.591203  | -1.363827 |
| 13            | 6             | 0           | -3.036510               | -2.737958 | -2.316187 |
| 14            | 6             | 0           | -1.639972               | -2.556185 | -2.667719 |
| 15            | 6             | 0           | -3.075308               | -3.392358 | -1.022773 |
| 16            | 6             | 0           | -0.815055               | -3.100182 | -1.608152 |
| 17            | 6             | 0           | -0.377738               | 2.563275  | -1.321151 |
| 18            | 6             | 0           | -0.002066               | -0.753371 | -2.892837 |
| 19            | 6             | 0           | -1.705765               | -3.608134 | -0.597158 |
| 20            | 6             | 0           | 0.850472                | -1.313837 | -1.943779 |
| 21            | 6             | 0           | 0.384061                | 1.480123  | -1.934555 |
| 22            | 6             | 0           | -4.994012               | -1.386062 | -1.657885 |
| 23            | 6             | 0           | -5.483214               | 0.788490  | -0.592956 |
| 24            | 6             | 0           | -0.085910               | 2.856750  | 0.093441  |
| 25            | 6             | 0           | -4.876267               | 2.095398  | -0.404215 |
| 26            | 6             | 0           | -2.757249               | 3.236697  | -0.941550 |
| 27            | 6             | 0           | -5.527827               | 0.128334  | 0.700367  |
| 28            | 6             | 0           | -4.582955               | 2.259430  | 1.005227  |
| 29            | 6             | 0           | -2.504102               | 3.438819  | 0.403982  |
| 30            | 6             | 0           | 0.413790                | -2.520064 | -1.240964 |
| 31            | 6             | 0           | -5.029488               | -2.019075 | -0.410375 |
| 32            | 6             | 0           | 1.505184                | 0.918004  | -1.227109 |
| 33            | 6             | 0           | -4.955977               | 1.027915  | 1.685407  |
| 34            | 6             | 0           | -3.439658               | 2.947537  | 1.404569  |
| 35            | 6             | 0           | -1.161229               | 3.268442  | 0.905346  |
| 36            | 6             | 0           | -1.276457               | 2.763589  | 2.248667  |
| 37            | 6             | 0           | 1.079514                | 2.250316  | 0.732325  |
| 38            | 6             | 0           | 1.761786                | -0.425111 | -1.257041 |
| 39            | 6             | 0           | 2.208387                | -2.117321 | 0.509588  |
| 40            | 6             | 0           | -2.652622               | 2.472336  | 2.521322  |
| 41            | 6             | 0           | -2.960592               | 1.245796  | 3.122517  |
| 42            | 6             | 0           | -1.920937               | 0.306532  | 3.497574  |
| 43            | 6             | 0           | -4.130013               | 0.520709  | 2.691740  |
| 44            | 6             | 0           | -4.041590               | -3.028665 | -0.085535 |
| 45            | 6             | 0           | 1.734178                | 0.846544  | 2.895001  |
| 46            | 6             | 0           | -5.286225               | -1.241107 | 0.791692  |
| 47            | 6             | 0           | -4.433026               | -1.759170 | 1.847874  |
| 48            | 6             | 0           | 0.982321                | 1.835848  | 2.053325  |
| 49            | 6             | 0           | 0.859799                | -2.630956 | 0.132284  |
| 50            | 6             | 0           | -0.073785               | -2.957900 | 1.111701  |
| 51            | 6             | 0           | -0.287188               | 1.929917  | 2.736906  |
| 52            | 6             | 0           | -0.603473               | 0.721647  | 3.454507  |
| 53            | 6             | 0           | -3.821917               | -0.891703 | 2.755609  |
| 54            | 6             | 0           | -2.437568               | -1.061783 | 3.187222  |
| 55            | 6             | 0           | 0.632624                | -0.142745 | 3.417276  |
| 56            | 6             | 0           | -3.674603               | -2.851711 | 1.312793  |
| 57            | 6             | 0           | -1.357717               | -3.430850 | 0.744104  |
| 58            | 6             | 0           | -0.172178               | -2.273938 | 2.490717  |
| 59            | 6             | 0           | -2.346365               | -2.999093 | 1.710150  |
| 60            | 6             | 0           | -1.710234               | -2.129119 | 2.666398  |
| 61            | 6             | 0           | 2.206441                | 1.805209  | -0.217358 |
| 62            | 6             | 0           | 2.872765                | -1.074218 | -0.449060 |
| 63            | 6             | 0           | 3.661109                | -0.029967 | 0.383454  |
| 64            | 7             | 0           | 3.297332                | 1.191639  | 0.498453  |
| 65            | 6             | 0           | 3.788536                | -1.749579 | -1.495955 |
| 66            | 6             | 0           | 2.871799                | 3.005057  | -0.929613 |
| 67            | 8             | 0           | 2.767047                | -2.533869 | 1.506593  |
| 68            | 8             | 0           | 2.872589                | 0.779232  | 3.290687  |
| 69            | 6             | 0           | 2.929091                | 4.273890  | -0.349526 |
| 70            | 6             | 0           | 3.610406                | 5.284295  | -1.024842 |
| 71            | 6             | 0           | 4.212575                | 4.990440  | -2.247455 |
| 72            | 6             | 0           | 4.110349                | 3.687226  | -2.735138 |
| 73            | 7             | 0           | 3.457804                | 2.710131  | -2.095905 |
| 74            | 6             | 0           | 4.504853                | -0.915279 | -2.364753 |
| 75            | 6             | 0           | 5.315066                | -1.465736 | -3.355467 |
| 76            | 6             | 0           | 5.410411                | -2.851768 | -3.499716 |
| 77            | 6             | 0           | 4.685574                | -3.683969 | -2.647207 |
| 78            | 6             | 0           | 3.875683                | -3.136317 | -1.650422 |
| 79            | 8             | 0           | 0.507498                | -1.037845 | 2.310342  |
| 80            | 8             | 0           | 0.983081                | -0.754479 | 4.598179  |
| 81            | 6             | 0           | 4.920635                | -0.395815 | 1.108228  |
| 82            | 6             | 0           | 5.504006                | -1.672281 | 1.086296  |
| 83            | 6             | 0           | 6.697852                | -1.925098 | 1.759810  |
| 84            | 6             | 0           | 7.334382                | -0.912025 | 2.474919  |
| 85            | 6             | 0           | 6.762768                | 0.362160  | 2.511824  |
| 86            | 6             | 0           | 5.575709                | 0.617139  | 1.835735  |
| 87            | 1             | 0           | 0.280215                | -2.837219 | 3.314635  |
| 88            | 1             | 0           | 2.451828                | 4.460284  | 0.605739  |
| 89            | 1             | 0           | 3.670239                | 6.282907  | -0.602368 |

|    |   |   |          |           |           |     |   |   |          |           |          |
|----|---|---|----------|-----------|-----------|-----|---|---|----------|-----------|----------|
| 90 | 1 | 0 | 4.751180 | 5.746553  | -2.809059 | 98  | 1 | 0 | 5.032733 | -2.482359 | 0.554232 |
| 91 | 1 | 0 | 4.572450 | 3.412978  | -3.681221 | 99  | 1 | 0 | 7.126889 | -2.922093 | 1.724144 |
| 92 | 1 | 0 | 4.408536 | 0.163836  | -2.273246 | 100 | 1 | 0 | 8.264297 | -1.112248 | 2.999790 |
| 93 | 1 | 0 | 5.870079 | -0.809148 | -4.019071 | 101 | 1 | 0 | 7.243240 | 1.160213  | 3.070461 |
| 94 | 1 | 0 | 6.042032 | -3.279036 | -4.272757 | 102 | 1 | 0 | 5.123510 | 1.599251  | 1.866340 |
| 95 | 1 | 0 | 4.748553 | -4.762994 | -2.752694 |     |   |   |          |           |          |
| 96 | 1 | 0 | 3.329172 | -3.798221 | -0.986399 |     |   |   |          |           |          |
| 97 | 1 | 0 | 1.955692 | -0.827804 | 4.579948  |     |   |   |          |           |          |

The total electronic energy was calculated to be -34 68.5391888 Hartree.

**Table S3.** Optimized structure of **3** (B3LYP-D3/6-31G(d,p))

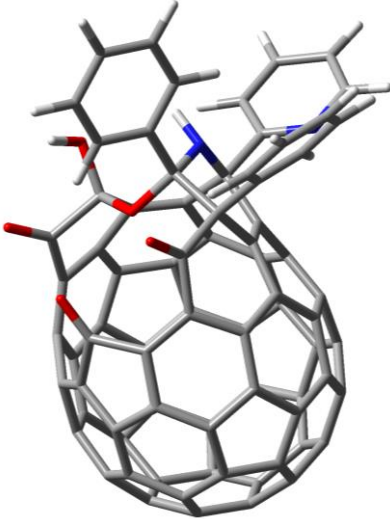

|    |   |   |           |           |           |
|----|---|---|-----------|-----------|-----------|
| 29 | 6 | 0 | 2.486252  | 2.622505  | -2.313953 |
| 30 | 6 | 0 | -0.206114 | -1.372187 | 2.564481  |
| 31 | 6 | 0 | 5.152291  | -1.476516 | 1.340663  |
| 32 | 6 | 0 | -1.391788 | 1.484717  | 0.625292  |
| 33 | 6 | 0 | 4.859154  | -0.168649 | -2.101928 |
| 34 | 6 | 0 | 3.357129  | 1.608066  | -2.890822 |
| 35 | 6 | 0 | 1.116761  | 2.252482  | -2.567579 |
| 36 | 6 | 0 | 1.150097  | 1.052059  | -3.358060 |
| 37 | 6 | 0 | -1.098923 | 1.583586  | -1.742016 |
| 38 | 6 | 0 | -1.590852 | 0.344401  | 1.371245  |
| 39 | 6 | 0 | -2.134677 | -2.111667 | 1.157560  |
| 40 | 6 | 0 | 2.497587  | 0.595876  | -3.466682 |
| 41 | 6 | 0 | 2.748224  | -0.763046 | -3.239951 |
| 42 | 6 | 0 | 1.692695  | -1.731921 | -2.970206 |
| 43 | 6 | 0 | 3.962027  | -1.136496 | -2.563002 |
| 44 | 6 | 0 | 4.187946  | -2.486983 | 1.720681  |
| 45 | 6 | 0 | -1.944606 | -0.758332 | -2.514608 |
| 46 | 6 | 0 | 5.308906  | -1.526275 | -0.105882 |
| 47 | 6 | 0 | 4.401095  | -2.538536 | -0.618368 |
| 48 | 6 | 0 | -1.082035 | 0.484300  | -2.573319 |
| 49 | 6 | 0 | -0.718949 | -2.291580 | 1.576943  |
| 50 | 6 | 0 | 0.156365  | -3.178884 | 0.962795  |
| 51 | 6 | 0 | 0.135722  | 0.126225  | -3.239633 |
| 52 | 6 | 0 | 0.378708  | -1.299559 | -3.174986 |
| 53 | 6 | 0 | 3.688861  | -2.330192 | -1.803946 |
| 54 | 6 | 0 | 2.282633  | -2.715574 | -1.975501 |
| 55 | 6 | 0 | -1.009382 | -1.859804 | -3.147304 |
| 56 | 6 | 0 | 3.735095  | -3.141048 | 0.500056  |
| 57 | 6 | 0 | 1.485748  | -3.303145 | 1.444953  |
| 58 | 6 | 0 | 0.197733  | -3.513077 | -0.521654 |
| 59 | 6 | 0 | 2.407529  | -3.507444 | 0.343674  |
| 60 | 6 | 0 | 1.677943  | -3.368679 | -0.896905 |
| 61 | 6 | 0 | -2.171820 | 1.757665  | -0.649265 |
| 62 | 6 | 0 | -2.702797 | -0.664941 | 1.070924  |
| 63 | 6 | 0 | -3.202237 | -0.512553 | -0.430218 |
| 64 | 7 | 0 | -3.326518 | 0.876161  | -0.750421 |
| 65 | 6 | 0 | -3.859363 | -0.426100 | 2.070575  |
| 66 | 6 | 0 | -2.755259 | 3.182563  | -0.655594 |
| 67 | 8 | 0 | -2.816965 | -3.095350 | 0.945707  |
| 68 | 8 | 0 | -3.109310 | -0.618605 | -3.261559 |
| 69 | 6 | 0 | -2.958049 | 3.866828  | -1.856771 |
| 70 | 6 | 0 | -3.572377 | 5.118034  | -1.817779 |
| 71 | 6 | 0 | -3.955679 | 5.639689  | -0.584136 |
| 72 | 6 | 0 | -3.709409 | 4.877321  | 0.559344  |
| 73 | 7 | 0 | -3.125888 | 3.675241  | 0.532802  |
| 74 | 6 | 0 | -4.207383 | 0.894268  | 2.398137  |
| 75 | 6 | 0 | -5.285126 | 1.155547  | 3.243429  |
| 76 | 6 | 0 | -6.028829 | 0.108081  | 3.787028  |
| 77 | 6 | 0 | -5.687292 | -1.205105 | 3.467774  |
| 78 | 6 | 0 | -4.616380 | -1.472613 | 2.614186  |
| 79 | 8 | 0 | -0.717833 | -3.778619 | -1.261695 |
| 80 | 8 | 0 | -1.455402 | -2.826446 | -3.716903 |
| 81 | 6 | 0 | -5.784544 | -3.120591 | -1.518605 |
| 82 | 6 | 0 | -4.565742 | -2.500358 | -1.249624 |
| 83 | 6 | 0 | -4.536566 | -1.206984 | -0.712256 |

Standard orientation:

| Center Number | Atomic Number | Atomic Type | Coordinates (Angstroms) |           |           |
|---------------|---------------|-------------|-------------------------|-----------|-----------|
|               |               |             | X                       | Y         | Z         |
| 1             | 6             | 0           | 3.846074                | 2.916541  | 0.977073  |
| 2             | 6             | 0           | 2.446640                | 3.241675  | 1.195315  |
| 3             | 6             | 0           | 1.769564                | 2.664204  | 2.256658  |
| 4             | 6             | 0           | 2.445967                | 1.745415  | 3.152729  |
| 5             | 6             | 0           | 3.782610                | 1.410228  | 2.932446  |
| 6             | 6             | 0           | 4.494619                | 2.004421  | 1.814198  |
| 7             | 6             | 0           | 1.785082                | 3.375077  | -0.088934 |
| 8             | 6             | 0           | 0.416077                | 2.210363  | 2.068615  |
| 9             | 6             | 0           | 1.486097                | 0.727067  | 3.516846  |
| 10            | 6             | 0           | 4.207578                | 0.026406  | 3.057736  |
| 11            | 6             | 0           | 5.354962                | 0.983454  | 1.241069  |
| 12            | 6             | 0           | 4.067607                | 2.882100  | -0.453081 |
| 13            | 6             | 0           | 3.281138                | -0.953387 | 3.424198  |
| 14            | 6             | 0           | 1.894621                | -0.591586 | 3.665594  |
| 15            | 6             | 0           | 3.281260                | -2.236828 | 2.750681  |
| 16            | 6             | 0           | 1.042837                | -1.639644 | 3.154806  |
| 17            | 6             | 0           | 0.461329                | 2.925709  | -0.292068 |
| 18            | 6             | 0           | 0.226476                | 1.017513  | 2.861316  |
| 19            | 6             | 0           | 1.902618                | -2.657547 | 2.602870  |
| 20            | 6             | 0           | -0.642301               | 0.015659  | 2.420243  |
| 21            | 6             | 0           | -0.250846               | 2.345255  | 0.849111  |
| 22            | 6             | 0           | 5.167356                | -0.241997 | 2.001193  |
| 23            | 6             | 0           | 5.546313                | 0.928763  | -0.141094 |
| 24            | 6             | 0           | 0.092182                | 2.409409  | -1.616402 |
| 25            | 6             | 0           | 4.909577                | 1.907853  | -1.005864 |
| 26            | 6             | 0           | 2.814515                | 3.211974  | -1.104488 |
| 27            | 6             | 0           | 5.519941                | -0.353186 | -0.824994 |
| 28            | 6             | 0           | 4.524613                | 1.240827  | -2.232476 |

|    |   |   |           |           |           |     |   |   |           |           |           |
|----|---|---|-----------|-----------|-----------|-----|---|---|-----------|-----------|-----------|
| 84 | 6 | 0 | -5.743677 | -0.552701 | -0.439246 | 95  | 1 | 0 | -4.395632 | -2.498182 | 2.352647  |
| 85 | 6 | 0 | -6.961693 | -1.178938 | -0.706262 | 96  | 1 | 0 | -5.791754 | -4.123332 | -1.935590 |
| 86 | 6 | 0 | -6.986771 | -2.462954 | -1.249582 | 97  | 1 | 0 | -3.634422 | -3.018706 | -1.443405 |
| 87 | 1 | 0 | -2.636497 | 3.429055  | -2.795832 | 98  | 1 | 0 | -5.727074 | 0.439881  | -0.004719 |
| 88 | 1 | 0 | -3.744020 | 5.674437  | -2.734311 | 99  | 1 | 0 | -7.889782 | -0.659592 | -0.485975 |
| 89 | 1 | 0 | -4.431902 | 6.611246  | -0.503945 | 100 | 1 | 0 | -7.934892 | -2.949720 | -1.459539 |
| 90 | 1 | 0 | -3.992666 | 5.248430  | 1.542115  | 101 | 8 | 0 | -2.139462 | -1.182657 | -1.179724 |
| 91 | 1 | 0 | -3.658914 | 1.729458  | 1.979363  | 102 | 1 | 0 | -3.828744 | 1.004567  | -1.622067 |
| 92 | 1 | 0 | -5.539620 | 2.185990  | 3.475164  | 103 | 1 | 0 | -3.425234 | -1.518713 | -3.454393 |
| 93 | 1 | 0 | -6.865938 | 0.312833  | 4.448301  |     |   |   |           |           |           |
| 94 | 1 | 0 | -6.260431 | -2.033159 | 3.874557  |     |   |   |           |           |           |

-----  
The total electronic energy was calculated to be -3543.7729827 Hartree.

## 4.2. Topological Analysis of H<sub>2</sub>O@1

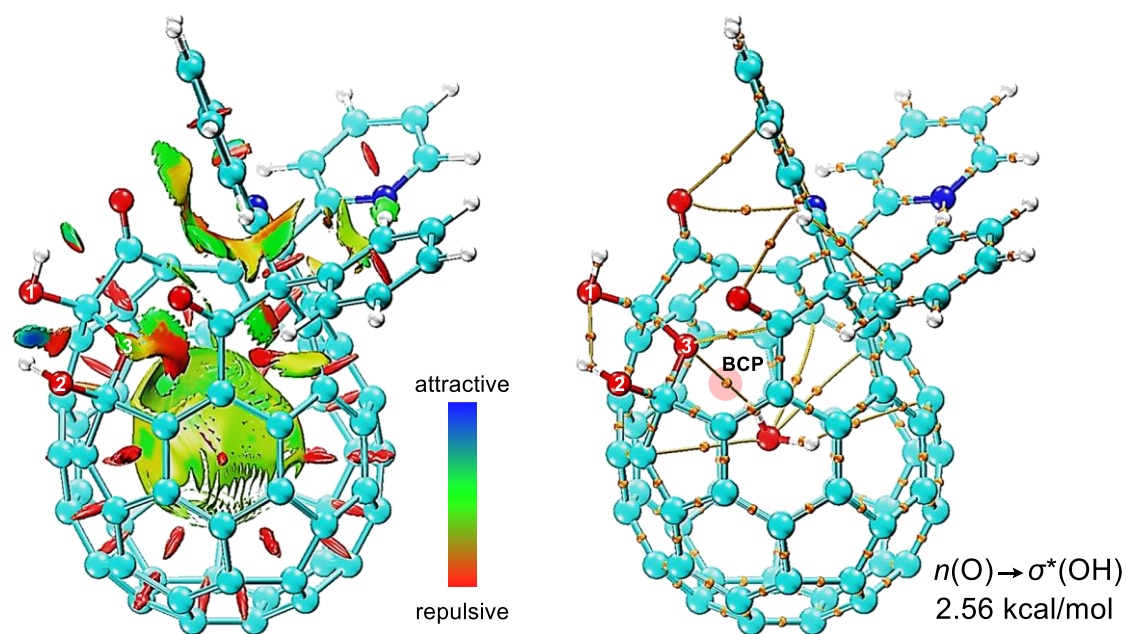

| Compd.                     | LUMO   | $q_{O(1)}$ | $q_{H(1)}$ | $\Delta q_1$ | $q_{O(2)}$ | $q_{H(2)}$ | $\Delta q_2$ |
|----------------------------|--------|------------|------------|--------------|------------|------------|--------------|
| <b>1</b>                   | -3.170 | -0.7544    | +0.5103    | +1.2647      | -0.7342    | +0.5038    | +1.2380      |
| H <sub>2</sub> O@ <b>1</b> | -3.134 | -0.7520    | +0.5115    | +1.2635      | -0.7313    | +0.5051    | +1.2364      |
| <b>1'</b>                  | -3.165 | -0.7539    | +0.5113    | +1.2651      | -0.7328    | +0.5046    | +1.2374      |

**Figure S6.** Topological analysis of electron densities for H<sub>2</sub>O@1 with selected natural charges (units in au) and LUMO levels (units in eV) (B3LYP-D3/6-31G(d,p)). The geometry of **1'** is generated by subtracting a coordinate of H<sub>2</sub>O from that of H<sub>2</sub>O@**1**.

**Table S4.** Optimized structure of H<sub>2</sub>O@1 (B3LYP-D3/6-31G(d,p))

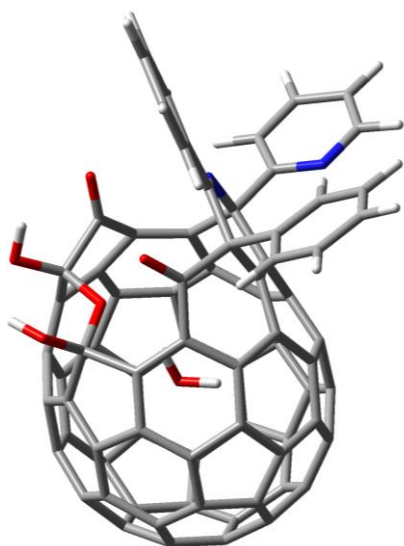

Standard orientation:

| Center Number | Atomic Number | Atomic Type | Coordinates (Angstroms) |           |           |
|---------------|---------------|-------------|-------------------------|-----------|-----------|
|               |               |             | X                       | Y         | Z         |
| 1             | 6             | 0           | 3.672626                | 2.727462  | 1.656163  |
| 2             | 6             | 0           | 2.259745                | 2.998931  | 1.860106  |
| 3             | 6             | 0           | 1.540657                | 2.239539  | 2.768885  |
| 4             | 6             | 0           | 2.181632                | 1.159300  | 3.499162  |
| 5             | 6             | 0           | 3.526864                | 0.868062  | 3.274051  |
| 6             | 6             | 0           | 4.288477                | 1.671574  | 2.332962  |
| 7             | 6             | 0           | 1.661162                | 3.360442  | 0.588154  |
| 8             | 6             | 0           | 0.197715                | 1.841650  | 2.440317  |
| 9             | 6             | 0           | 1.212328                | 0.092372  | 3.614131  |
| 10            | 6             | 0           | 3.950359                | -0.514588 | 3.136469  |
| 11            | 6             | 0           | 5.190464                | 0.785406  | 1.617894  |
| 12            | 6             | 0           | 3.967987                | 2.971307  | 0.261184  |
| 13            | 6             | 0           | 3.008418                | -1.542603 | 3.240332  |
| 14            | 6             | 0           | 1.612834                | -1.232568 | 3.490067  |
| 15            | 6             | 0           | 3.044419                | -2.653784 | 2.310054  |
| 16            | 6             | 0           | 0.786983                | -2.146681 | 2.727493  |
| 17            | 6             | 0           | 0.360355                | 2.943593  | 0.233574  |
| 18            | 6             | 0           | -0.022098               | 0.517863  | 2.989007  |
| 19            | 6             | 0           | 1.676372                | -3.014900 | 2.000490  |
| 20            | 6             | 0           | -0.875353               | -0.370814 | 2.336561  |
| 21            | 6             | 0           | -0.403959               | 2.195174  | 1.226209  |
| 22            | 6             | 0           | 4.969017                | -0.566991 | 2.103026  |
| 23            | 6             | 0           | 5.461139                | 1.007724  | 0.266672  |
| 24            | 6             | 0           | 0.070143                | 2.649871  | -1.180415 |
| 25            | 6             | 0           | 4.856831                | 2.134648  | -0.423024 |
| 26            | 6             | 0           | 2.741793                | 3.399540  | -0.381051 |
| 27            | 6             | 0           | 5.504700                | -0.109380 | -0.660302 |
| 28            | 6             | 0           | 4.563316                | 1.728149  | -1.781608 |
| 29            | 6             | 0           | 2.488592                | 3.052813  | -1.695287 |
| 30            | 6             | 0           | -0.441129               | -1.756985 | 2.163139  |
| 31            | 6             | 0           | 4.999990                | -1.640319 | 1.206413  |
| 32            | 6             | 0           | -1.525887               | 1.399888  | 0.798411  |
| 33            | 6             | 0           | 4.934227                | 0.328134  | -1.919482 |

|    |   |   |           |           |           |
|----|---|---|-----------|-----------|-----------|
| 34 | 6 | 0 | 3.422170  | 2.204712  | -2.419611 |
| 35 | 6 | 0 | 1.145654  | 2.702324  | -2.087205 |
| 36 | 6 | 0 | 1.259714  | 1.706405  | -3.119127 |
| 37 | 6 | 0 | -1.095422 | 1.840984  | -1.525288 |
| 38 | 6 | 0 | -1.785703 | 0.177734  | 1.355581  |
| 39 | 6 | 0 | -2.249988 | -2.082182 | 0.415318  |
| 40 | 6 | 0 | 2.634239  | 1.327615  | -3.255363 |
| 41 | 6 | 0 | 2.942119  | -0.035574 | -3.325119 |
| 42 | 6 | 0 | 1.902532  | -1.045487 | -3.300140 |
| 43 | 6 | 0 | 4.109269  | -0.534248 | -2.644037 |
| 44 | 6 | 0 | 4.009188  | -2.692043 | 1.305531  |
| 45 | 6 | 0 | -1.750456 | -0.304180 | -2.959851 |
| 46 | 6 | 0 | 5.259747  | -1.402670 | -0.204347 |
| 47 | 6 | 0 | 4.405221  | -2.292844 | -0.970450 |
| 48 | 6 | 0 | -0.998780 | 0.933089  | -2.571589 |
| 49 | 6 | 0 | -0.889104 | -2.400868 | 0.944340  |
| 50 | 6 | 0 | 0.043673  | -3.096317 | 0.181344  |
| 51 | 6 | 0 | 0.271082  | 0.748905  | -3.235509 |
| 52 | 6 | 0 | 0.587973  | -0.642490 | -3.424006 |
| 53 | 6 | 0 | 3.799748  | -1.856863 | -2.148350 |
| 54 | 6 | 0 | 2.415223  | -2.184579 | -2.480695 |
| 55 | 6 | 0 | -0.648363 | -1.419548 | -3.069952 |
| 56 | 6 | 0 | 3.641267  | -3.081268 | -0.048086 |
| 57 | 6 | 0 | 1.328107  | -3.381470 | 0.700054  |
| 58 | 6 | 0 | 0.137568  | -3.070916 | -1.364554 |
| 59 | 6 | 0 | 2.317269  | -3.377438 | -0.358505 |
| 60 | 6 | 0 | 1.687041  | -2.961505 | -1.585035 |
| 61 | 6 | 0 | -2.225304 | 1.814314  | -0.481277 |
| 62 | 6 | 0 | -2.900971 | -0.733307 | 0.875710  |
| 63 | 6 | 0 | -3.686181 | -0.104662 | -0.304983 |
| 64 | 7 | 0 | -3.316951 | 0.969081  | -0.896419 |
| 65 | 6 | 0 | -3.815780 | -0.927453 | 2.107078  |
| 66 | 6 | 0 | -2.885444 | 3.200485  | -0.303445 |
| 67 | 8 | 0 | -2.833692 | -2.869439 | -0.301271 |
| 68 | 8 | 0 | -2.888786 | -0.528390 | -3.293910 |
| 69 | 6 | 0 | -2.929955 | 4.141015  | -1.334235 |
| 70 | 6 | 0 | -3.607227 | 5.338631  | -1.113466 |
| 71 | 6 | 0 | -4.217735 | 5.549738  | 0.121936  |
| 72 | 6 | 0 | -4.127407 | 4.541195  | 1.081852  |
| 73 | 7 | 0 | -3.478974 | 3.388814  | 0.880945  |
| 74 | 6 | 0 | -4.522379 | 0.189754  | 2.572389  |
| 75 | 6 | 0 | -5.330658 | 0.086328  | 3.702483  |
| 76 | 6 | 0 | -5.433395 | -1.126363 | 4.387822  |
| 77 | 6 | 0 | -4.718437 | -2.235265 | 3.936096  |
| 78 | 6 | 0 | -3.910728 | -2.137203 | 2.801547  |
| 79 | 8 | 0 | -0.552727 | -1.863463 | -1.712211 |
| 80 | 8 | 0 | -1.009585 | -2.414959 | -3.964248 |
| 81 | 8 | 0 | -0.418241 | -4.207134 | -1.932166 |
| 82 | 6 | 0 | -4.946725 | -0.724432 | -0.826202 |
| 83 | 6 | 0 | -5.548542 | -1.871428 | -0.284769 |
| 84 | 6 | 0 | -6.742491 | -2.366924 | -0.805997 |
| 85 | 6 | 0 | -7.361138 | -1.733649 | -1.882460 |
| 86 | 6 | 0 | -6.771905 | -0.594451 | -2.436183 |
| 87 | 6 | 0 | -5.585194 | -0.095155 | -1.913227 |
| 88 | 1 | 0 | -2.445904 | 3.936610  | -2.282301 |
| 89 | 1 | 0 | -3.657291 | 6.092472  | -1.893488 |
| 90 | 1 | 0 | -4.753496 | 6.467950  | 0.338776  |
| 91 | 1 | 0 | -4.595678 | 4.661895  | 2.056504  |
| 92 | 1 | 0 | -4.420704 | 1.141802  | 2.057221  |
| 93 | 1 | 0 | -5.878376 | 0.957206  | 4.050446  |

|     |   |   |           |           |           |     |   |   |           |           |           |
|-----|---|---|-----------|-----------|-----------|-----|---|---|-----------|-----------|-----------|
| 94  | 1 | 0 | -6.063207 | -1.205014 | 5.268874  | 102 | 1 | 0 | -7.238488 | -0.093115 | -3.279255 |
| 95  | 1 | 0 | -4.788053 | -3.182355 | 4.462875  | 103 | 1 | 0 | -5.120447 | 0.781904  | -2.342865 |
| 96  | 1 | 0 | -3.374863 | -3.014052 | 2.453089  | 104 | 8 | 0 | 1.700020  | -0.060137 | -0.156311 |
| 97  | 1 | 0 | -1.984379 | -2.464986 | -3.916607 | 105 | 1 | 0 | 1.436855  | 0.142944  | 0.749130  |
| 98  | 1 | 0 | -0.412185 | -4.074019 | -2.894020 | 106 | 1 | 0 | 0.895939  | -0.417201 | -0.559241 |
| 99  | 1 | 0 | -5.092777 | -2.395898 | 0.538940  |     |   |   |           |           |           |
| 100 | 1 | 0 | -7.185177 | -3.255563 | -0.366011 |     |   |   |           |           |           |
| 101 | 1 | 0 | -8.290882 | -2.123311 | -2.287482 |     |   |   |           |           |           |

-----  
The total electronic energy was calculated to be -3620.2157964 Hartree.

### 4.3. Gas-Phase Acidity

Gas-phase acidity was calculated by the equation:

$$\Delta H = H(A^-) + H(H^+) - H(HA)$$

where  $H(H^+)$  is +1.48121 kcal/mol.

| Gas-phase acidity     |     |
|-----------------------|-----|
| $\Delta H$ (kcal/mol) |     |
| O(1)H                 | 334 |
| O(2)H                 | 335 |
| PhOH                  | 361 |
| <i>t</i> -BuOH        | 392 |
| HCl                   | 343 |
| HBr                   | 328 |
| HI                    | 317 |

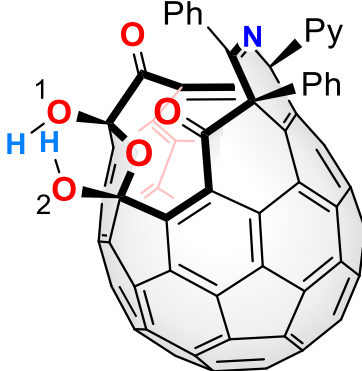

**Figure S7.** Gas-phase acidity of **1** and selected alcohols and hydrogen halides (B3LYP-D3 with basis sets of LanL2DZ for halogens and 6-31G(d,p) for the rest).



**Table S5.** Optimized structure of **1-O(1)<sup>-</sup>** (B3LYP-D3/6-31G(d,p))

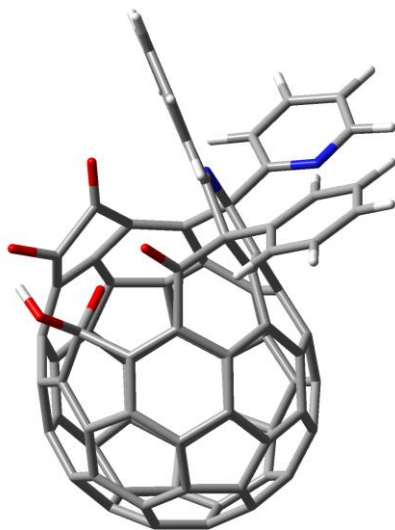

Standard orientation:

| Center Number | Atomic Number | Atomic Type | Coordinates (Angstroms) |           |           |
|---------------|---------------|-------------|-------------------------|-----------|-----------|
|               |               |             | X                       | Y         | Z         |
| 1             | 6             | 0           | 3.699115                | 2.558901  | 1.895802  |
| 2             | 6             | 0           | 2.284036                | 2.807369  | 2.119833  |
| 3             | 6             | 0           | 1.564434                | 1.967060  | 2.954680  |
| 4             | 6             | 0           | 2.205297                | 0.827752  | 3.589327  |
| 5             | 6             | 0           | 3.552031                | 0.559845  | 3.341190  |
| 6             | 6             | 0           | 4.314936                | 1.445706  | 2.476670  |
| 7             | 6             | 0           | 1.688227                | 3.279359  | 0.882534  |
| 8             | 6             | 0           | 0.223946                | 1.596130  | 2.588919  |
| 9             | 6             | 0           | 1.236459                | -0.245822 | 3.609516  |
| 10            | 6             | 0           | 3.976114                | -0.804773 | 3.079788  |
| 11            | 6             | 0           | 5.218517                | 0.628162  | 1.685159  |
| 12            | 6             | 0           | 3.997306                | 2.929316  | 0.528581  |
| 13            | 6             | 0           | 3.033498                | -1.838807 | 3.087776  |
| 14            | 6             | 0           | 1.637528                | -1.554556 | 3.366722  |
| 15            | 6             | 0           | 3.068637                | -2.862224 | 2.061151  |
| 16            | 6             | 0           | 0.810989                | -2.400793 | 2.530296  |
| 17            | 6             | 0           | 0.390914                | 2.883194  | 0.485190  |
| 18            | 6             | 0           | 0.003087                | 0.232162  | 3.021754  |
| 19            | 6             | 0           | 1.699143                | -3.195717 | 1.722086  |
| 20            | 6             | 0           | -0.848903               | -0.596009 | 2.292494  |
| 21            | 6             | 0           | -0.374795               | 2.052521  | 1.408138  |
| 22            | 6             | 0           | 4.995454                | -0.763216 | 2.045961  |
| 23            | 6             | 0           | 5.490935                | 0.971816  | 0.358418  |
| 24            | 6             | 0           | 0.101848                | 2.712229  | -0.948918 |
| 25            | 6             | 0           | 4.888560                | 2.158210  | -0.229179 |
| 26            | 6             | 0           | 2.771137                | 3.412369  | -0.075795 |
| 27            | 6             | 0           | 5.536327                | -0.056742 | -0.666982 |
| 28            | 6             | 0           | 4.601019                | 1.878374  | -1.621692 |
| 29            | 6             | 0           | 2.518638                | 3.182669  | -1.417312 |
| 30            | 6             | 0           | -0.419399               | -1.964032 | 2.003150  |
| 31            | 6             | 0           | 5.025146                | -1.751205 | 1.054431  |
| 32            | 6             | 0           | -1.497792               | 1.301493  | 0.910832  |
| 33            | 6             | 0           | 4.969938                | 0.494865  | -1.883618 |

|    |   |   |           |           |           |
|----|---|---|-----------|-----------|-----------|
| 34 | 6 | 0 | 3.455556  | 2.406119  | -2.217520 |
| 35 | 6 | 0 | 1.176980  | 2.866156  | -1.845699 |
| 36 | 6 | 0 | 1.294598  | 1.973448  | -2.967757 |
| 37 | 6 | 0 | -1.060806 | 1.932128  | -1.376373 |
| 38 | 6 | 0 | -1.756526 | 0.036063  | 1.360595  |
| 39 | 6 | 0 | -2.240218 | -2.157187 | 0.257344  |
| 40 | 6 | 0 | 2.671809  | 1.616267  | -3.140252 |
| 41 | 6 | 0 | 2.973758  | 0.258122  | -3.324751 |
| 42 | 6 | 0 | 1.936107  | -0.747097 | -3.402859 |
| 43 | 6 | 0 | 4.139691  | -0.298426 | -2.681990 |
| 44 | 6 | 0 | 4.032148  | -2.807847 | 1.055153  |
| 45 | 6 | 0 | -1.746261 | -0.063945 | -3.056432 |
| 46 | 6 | 0 | 5.285640  | -1.386913 | -0.329706 |
| 47 | 6 | 0 | 4.433018  | -2.205851 | -1.174058 |
| 48 | 6 | 0 | -0.967497 | 1.129831  | -2.506172 |
| 49 | 6 | 0 | -0.870212 | -2.504106 | 0.738158  |
| 50 | 6 | 0 | 0.058649  | -3.111621 | -0.097329 |
| 51 | 6 | 0 | 0.305226  | 1.026664  | -3.175129 |
| 52 | 6 | 0 | 0.614758  | -0.342438 | -3.474468 |
| 53 | 6 | 0 | 3.823223  | -1.659115 | -2.306100 |
| 54 | 6 | 0 | 2.437579  | -1.948976 | -2.671138 |
| 55 | 6 | 0 | -0.641960 | -1.195687 | -3.328775 |
| 56 | 6 | 0 | 3.664871  | -3.073039 | -0.329072 |
| 57 | 6 | 0 | 1.346523  | -3.434544 | 0.390632  |
| 58 | 6 | 0 | 0.120312  | -2.891074 | -1.640928 |
| 59 | 6 | 0 | 2.332735  | -3.322347 | -0.666876 |
| 60 | 6 | 0 | 1.695617  | -2.793341 | -1.845346 |
| 61 | 6 | 0 | -2.190158 | 1.822884  | -0.333096 |
| 62 | 6 | 0 | -2.871842 | -0.827622 | 0.801382  |
| 63 | 6 | 0 | -3.651065 | -0.102070 | -0.323929 |
| 64 | 7 | 0 | -3.296597 | 1.027223  | -0.806855 |
| 65 | 6 | 0 | -3.796514 | -1.098455 | 2.012295  |
| 66 | 6 | 0 | -2.844632 | 3.194862  | -0.051135 |
| 67 | 8 | 0 | -2.874856 | -2.929001 | -0.430588 |
| 68 | 8 | 0 | -2.899733 | -0.120977 | -3.399706 |
| 69 | 6 | 0 | -2.893241 | 4.199654  | -1.021856 |
| 70 | 6 | 0 | -3.560523 | 5.384727  | -0.725071 |
| 71 | 6 | 0 | -4.160446 | 5.526098  | 0.526426  |
| 72 | 6 | 0 | -4.069369 | 4.459983  | 1.420720  |
| 73 | 7 | 0 | -3.430705 | 3.317301  | 1.146506  |
| 74 | 6 | 0 | -4.503645 | -0.012801 | 2.547899  |
| 75 | 6 | 0 | -5.315898 | -0.184239 | 3.666615  |
| 76 | 6 | 0 | -5.424109 | -1.436917 | 4.275230  |
| 77 | 6 | 0 | -4.709097 | -2.515576 | 3.755715  |
| 78 | 6 | 0 | -3.898035 | -2.348351 | 2.631508  |
| 79 | 8 | 0 | -0.508252 | -1.656918 | -1.831125 |
| 80 | 8 | 0 | -0.872487 | -2.120814 | -4.178807 |
| 81 | 8 | 0 | -0.433561 | -3.931081 | -2.370166 |
| 82 | 6 | 0 | -4.915932 | -0.672321 | -0.898030 |
| 83 | 6 | 0 | -5.556187 | -1.825046 | -0.418264 |
| 84 | 6 | 0 | -6.761591 | -2.257462 | -0.969747 |
| 85 | 6 | 0 | -7.351263 | -1.555952 | -2.019416 |
| 86 | 6 | 0 | -6.717389 | -0.415650 | -2.518338 |
| 87 | 6 | 0 | -5.519656 | 0.021171  | -1.964766 |
| 88 | 1 | 0 | -2.415984 | 4.043762  | -1.982172 |
| 89 | 1 | 0 | -3.611492 | 6.184374  | -1.458747 |
| 90 | 1 | 0 | -4.688092 | 6.433425  | 0.803374  |
| 91 | 1 | 0 | -4.530504 | 4.524034  | 2.404968  |
| 92 | 1 | 0 | -4.396367 | 0.969778  | 2.095307  |
| 93 | 1 | 0 | -5.862020 | 0.665688  | 4.066638  |

|    |   |   |           |           |           |     |   |   |           |           |           |
|----|---|---|-----------|-----------|-----------|-----|---|---|-----------|-----------|-----------|
| 94 | 1 | 0 | -6.056857 | -1.569419 | 5.148442  | 100 | 1 | 0 | -8.288299 | -1.898277 | -2.451368 |
| 95 | 1 | 0 | -4.780626 | -3.494432 | 4.221738  | 101 | 1 | 0 | -7.152988 | 0.132087  | -3.349626 |
| 96 | 1 | 0 | -3.362893 | -3.201052 | 2.228206  | 102 | 1 | 0 | -5.010699 | 0.888903  | -2.360609 |
| 97 | 1 | 0 | -0.691261 | -3.484620 | -3.226955 |     |   |   |           |           |           |
| 98 | 1 | 0 | -5.118861 | -2.404339 | 0.377815  |     |   |   |           |           |           |
| 99 | 1 | 0 | -7.233155 | -3.153851 | -0.576621 |     |   |   |           |           |           |

The total electronic energy was calculated to be -3543.21 75641 Hartree.

**Table S6.** Optimized structure of  $1-O(2)^-$  (B3LYP-D3/6-31G(d,p))

Standard orientation:

| Center Number | Atomic Number | Atomic Type | Coordinates (Angstroms) |           |           |
|---------------|---------------|-------------|-------------------------|-----------|-----------|
|               |               |             | X                       | Y         | Z         |
| 1             | 6             | 0           | 3.697459                | 2.648736  | 1.778050  |
| 2             | 6             | 0           | 2.282652                | 2.905125  | 1.992876  |
| 3             | 6             | 0           | 1.564572                | 2.100269  | 2.863148  |
| 4             | 6             | 0           | 2.207110                | 0.989375  | 3.544691  |
| 5             | 6             | 0           | 3.554234                | 0.713174  | 3.308493  |
| 6             | 6             | 0           | 4.314521                | 1.561536  | 2.404900  |
| 7             | 6             | 0           | 1.684456                | 3.325069  | 0.738064  |
| 8             | 6             | 0           | 0.224336                | 1.712004  | 2.513881  |
| 9             | 6             | 0           | 1.239566                | -0.083533 | 3.611509  |
| 10            | 6             | 0           | 3.980179                | -0.660954 | 3.106503  |
| 11            | 6             | 0           | 5.219451                | 0.711747  | 1.649463  |
| 12            | 6             | 0           | 3.992731                | 2.957947  | 0.395213  |
| 13            | 6             | 0           | 3.038964                | -1.695013 | 3.159374  |
| 14            | 6             | 0           | 1.641999                | -1.400747 | 3.423253  |
| 15            | 6             | 0           | 3.075751                | -2.763138 | 2.179314  |
| 16            | 6             | 0           | 0.817787                | -2.284508 | 2.624336  |
| 17            | 6             | 0           | 0.385294                | 2.915328  | 0.360973  |
| 18            | 6             | 0           | 0.007457                | 0.365909  | 3.001113  |
| 19            | 6             | 0           | 1.707298                | -3.114935 | 1.854219  |
| 20            | 6             | 0           | -0.838185               | -0.495332 | 2.302897  |
| 21            | 6             | 0           | -0.378287               | 2.120529  | 1.317897  |
| 22            | 6             | 0           | 4.999780                | -0.662993 | 2.071762  |
| 23            | 6             | 0           | 5.489617                | 0.996566  | 0.308466  |
| 24            | 6             | 0           | 0.093784                | 2.687871  | -1.064574 |
| 25            | 6             | 0           | 4.883422                | 2.154758  | -0.328704 |
| 26            | 6             | 0           | 2.765434                | 3.414382  | -0.227750 |
| 27            | 6             | 0           | 5.537066                | -0.076104 | -0.671100 |
| 28            | 6             | 0           | 4.591795                | 1.811899  | -1.706090 |
| 29            | 6             | 0           | 2.511489                | 3.126702  | -1.558135 |
| 30            | 6             | 0           | -0.409289               | -1.873087 | 2.071326  |
| 31            | 6             | 0           | 5.030602                | -1.693646 | 1.125384  |
| 32            | 6             | 0           | -1.498621               | 1.344723  | 0.853504  |
| 33            | 6             | 0           | 4.964265                | 0.419004  | -1.908146 |
| 34            | 6             | 0           | 3.446802                | 2.313676  | -2.322921 |
| 35            | 6             | 0           | 1.168473                | 2.792503  | -1.969121 |
| 36            | 6             | 0           | 1.284672                | 1.846782  | -3.049009 |
| 37            | 6             | 0           | -1.070579               | 1.889805  | -1.452434 |
| 38            | 6             | 0           | -1.749649               | 0.094657  | 1.349075  |
| 39            | 6             | 0           | -2.231473               | -2.153300 | 0.340981  |
| 40            | 6             | 0           | 2.659621                | 1.478330  | -3.202998 |
| 41            | 6             | 0           | 2.961828                | 0.114070  | -3.325339 |
| 42            | 6             | 0           | 1.923441                | -0.897507 | -3.343606 |
| 43            | 6             | 0           | 4.133618                | -0.411491 | -2.668356 |
| 44            | 6             | 0           | 4.042209                | -2.753278 | 1.174511  |
| 45            | 6             | 0           | -1.743807               | -0.184453 | -3.018776 |
| 46            | 6             | 0           | 5.288393                | -1.391015 | -0.274811 |
| 47            | 6             | 0           | 4.441502                | -2.251537 | -1.080664 |
| 48            | 6             | 0           | -0.971780               | 1.033625  | -2.537372 |
| 49            | 6             | 0           | -0.863172               | -2.482305 | 0.835477  |
| 50            | 6             | 0           | 0.058442                | -3.140186 | 0.030058  |
| 51            | 6             | 0           | 0.297503                | 0.888479  | -3.203498 |
| 52            | 6             | 0           | 0.601658                | -0.496598 | -3.434189 |
| 53            | 6             | 0           | 3.825489                | -1.757079 | -2.234488 |
| 54            | 6             | 0           | 2.443251                | -2.073834 | -2.583007 |
| 55            | 6             | 0           | -0.649159               | -1.319100 | -3.127358 |
| 56            | 6             | 0           | 3.675407                | -3.082392 | -0.194904 |
| 57            | 6             | 0           | 1.352773                | -3.420130 | 0.537663  |
| 58            | 6             | 0           | 0.137155                | -3.102200 | -1.562396 |
| 59            | 6             | 0           | 2.345764                | -3.356799 | -0.519409 |
| 60            | 6             | 0           | 1.708288                | -2.882537 | -1.718520 |
| 61            | 6             | 0           | -2.198217               | 1.816040  | -0.405164 |
| 62            | 6             | 0           | -2.862854               | -0.796088 | 0.829940  |
| 63            | 6             | 0           | -3.647790               | -0.116821 | -0.319507 |
| 64            | 7             | 0           | -3.299868               | 0.995471  | -0.847112 |
| 65            | 6             | 0           | -3.784642               | -1.020262 | 2.052994  |
| 66            | 6             | 0           | -2.858311               | 3.194082  | -0.171655 |
| 67            | 8             | 0           | -2.870467               | -2.943140 | -0.321727 |
| 68            | 8             | 0           | -2.888714               | -0.280184 | -3.378687 |
| 69            | 6             | 0           | -2.895270               | 4.173792  | -1.167940 |
| 70            | 6             | 0           | -3.566378               | 5.366009  | -0.909587 |
| 71            | 6             | 0           | -4.181936               | 5.538783  | 0.330038  |
| 72            | 6             | 0           | -4.101588               | 4.495656  | 1.252305  |
| 73            | 7             | 0           | -3.459023               | 3.347264  | 1.015272  |
| 74            | 6             | 0           | -4.490404               | 0.084324  | 2.550493  |
| 75            | 6             | 0           | -5.302140               | -0.046762 | 3.675137  |
| 76            | 6             | 0           | -5.411237               | -1.277027 | 4.327621  |
| 77            | 6             | 0           | -4.697488               | -2.374018 | 3.846108  |
| 78            | 6             | 0           | -3.887184               | -2.247488 | 2.716116  |
| 79            | 8             | 0           | -0.542161               | -1.749181 | -1.783507 |
| 80            | 8             | 0           | -0.952762               | -2.298316 | -4.039987 |
| 81            | 8             | 0           | -0.334641               | -4.063249 | -2.271794 |
| 82            | 6             | 0           | -4.911718               | -0.711904 | -0.870415 |
| 83            | 6             | 0           | -5.546104               | -1.849720 | -0.349102 |
| 84            | 6             | 0           | -6.749932               | -2.307236 | -0.883546 |
| 85            | 6             | 0           | -7.344419               | -1.646594 | -1.956708 |
| 86            | 6             | 0           | -6.717482               | -0.520842 | -2.495826 |
| 87            | 6             | 0           | -5.521493               | -0.058933 | -1.959173 |

|    |   |   |           |           |           |                                                                         |   |   |           |           |           |
|----|---|---|-----------|-----------|-----------|-------------------------------------------------------------------------|---|---|-----------|-----------|-----------|
| 88 | 1 | 0 | -2.405811 | 3.995387  | -2.118142 | 97                                                                      | 1 | 0 | -0.813484 | -3.160475 | -3.540193 |
| 89 | 1 | 0 | -3.607928 | 6.146866  | -1.663783 | 98                                                                      | 1 | 0 | -5.104967 | -2.398761 | 0.465962  |
| 90 | 1 | 0 | -4.713119 | 6.452562  | 0.577347  | 99                                                                      | 1 | 0 | -7.216312 | -3.191604 | -0.458435 |
| 91 | 1 | 0 | -4.574874 | 4.584364  | 2.228817  | 100                                                                     | 1 | 0 | -8.280111 | -2.008829 | -2.375086 |
| 92 | 1 | 0 | -4.382803 | 1.050344  | 2.063540  | 101                                                                     | 1 | 0 | -7.157615 | -0.003835 | -3.344274 |
| 93 | 1 | 0 | -5.847228 | 0.817275  | 4.045308  | 102                                                                     | 1 | 0 | -5.019897 | 0.799318  | -2.384182 |
| 94 | 1 | 0 | -6.043580 | -1.378069 | 5.205352  | -----                                                                   |   |   |           |           |           |
| 95 | 1 | 0 | -4.769550 | -3.335778 | 4.346381  | The total electronic energy was calculated to be -3543.2163087 Hartree. |   |   |           |           |           |
| 96 | 1 | 0 | -3.353163 | -3.114393 | 2.342920  |                                                                         |   |   |           |           |           |

#### 4.4. Simulated IR Spectra of $1 \cdot (\text{H}_2\text{O})_{39}$

The four local minimum structures of  $1 \cdot (\text{H}_2\text{O})_{39}$ , i.e., **A**, **B**, **C**, and **D**, were computed with the use of different initial coordinates. The presence of acidic water was suggested for all cases with elongated OH bond lengths, showing their absorption bands at around  $2000\text{--}3000\text{ cm}^{-1}$ . For model structures of water adsorbed [60]fullerenes, 60–70 water molecules are usually employed.<sup>4</sup> In our cases, nearly one third of [60]fullerene sphere is covered by the aryl functional groups which do not participate in the water adsorption since experimental results did not show any change in band intensity and wavenumbers. Thus, ca. 40 water molecules are considered to be enough to describe the adsorbed physical picture. To suppress the calculations cost, we then computed some local minimum structures for  $1 \cdot (\text{H}_2\text{O})_{39}$ .

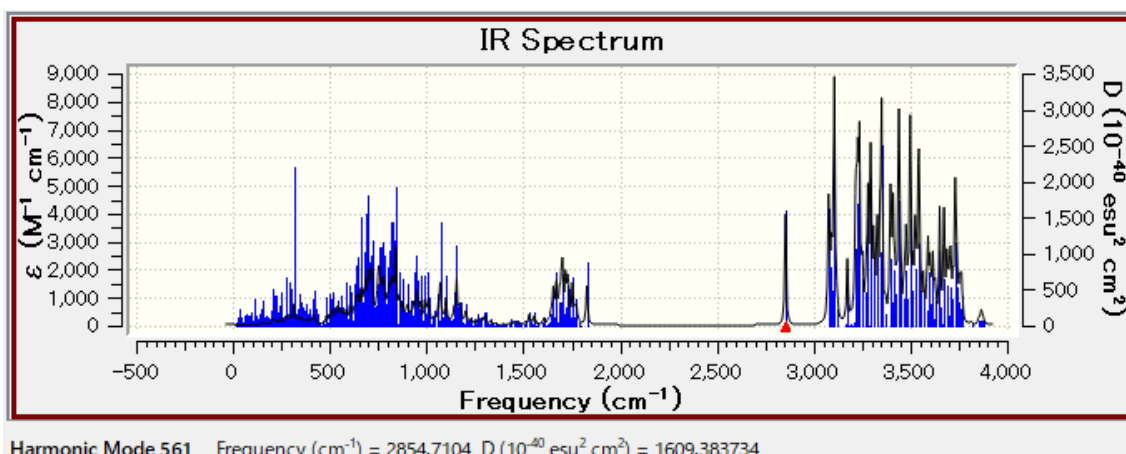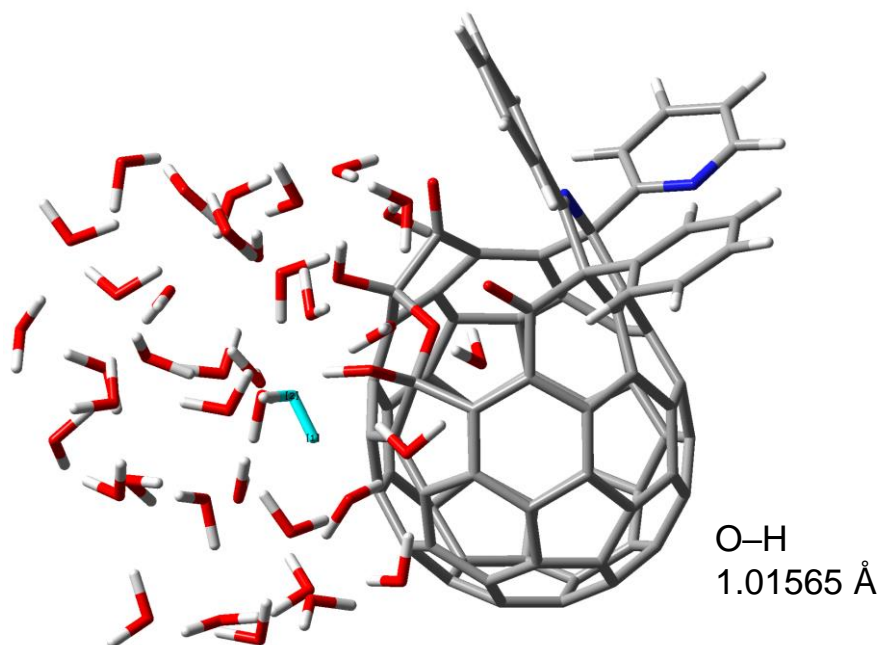

**Figure S8.** Simulated IR spectra of  $1 \cdot (\text{H}_2\text{O})_{39}$ -A (B3LYP-D3/6-31G(d,p)).



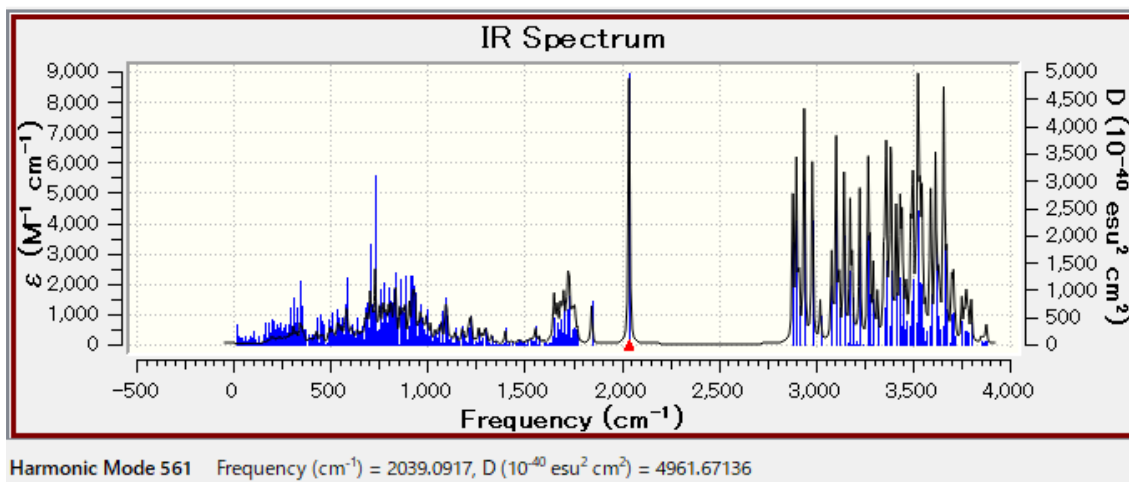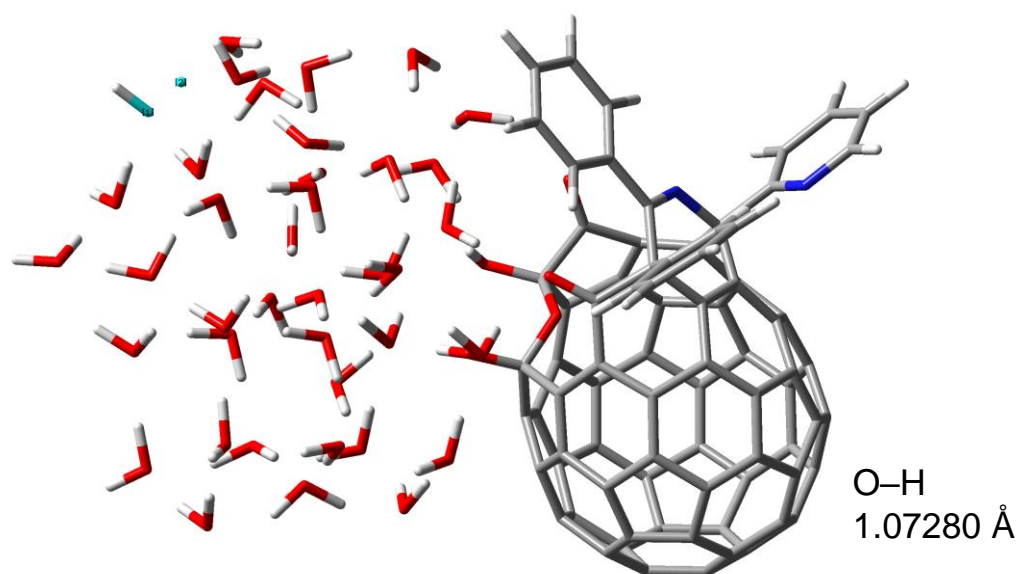

**Figure S9.** Simulated IR spectra of  $1 \cdot (\text{H}_2\text{O})_{39} \cdot \mathbf{B}$  (B3LYP-D3/6-31G(d,p)).

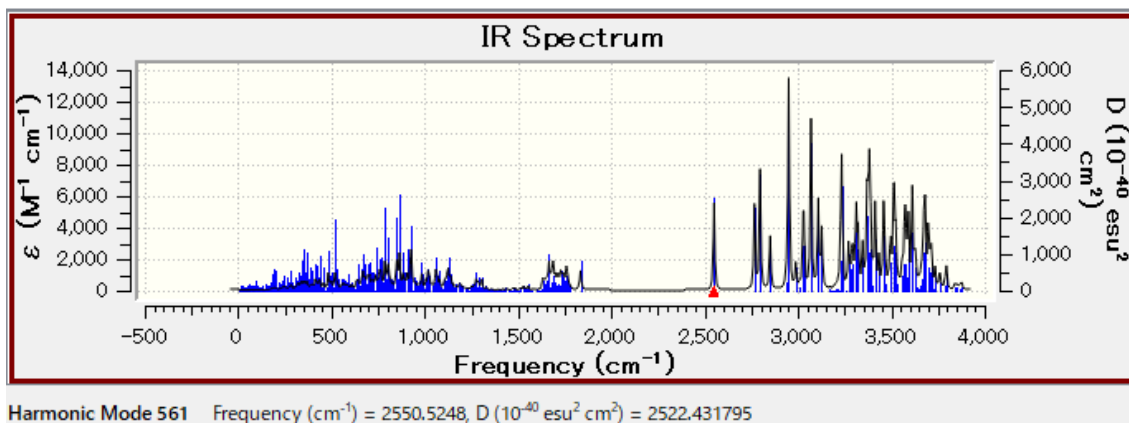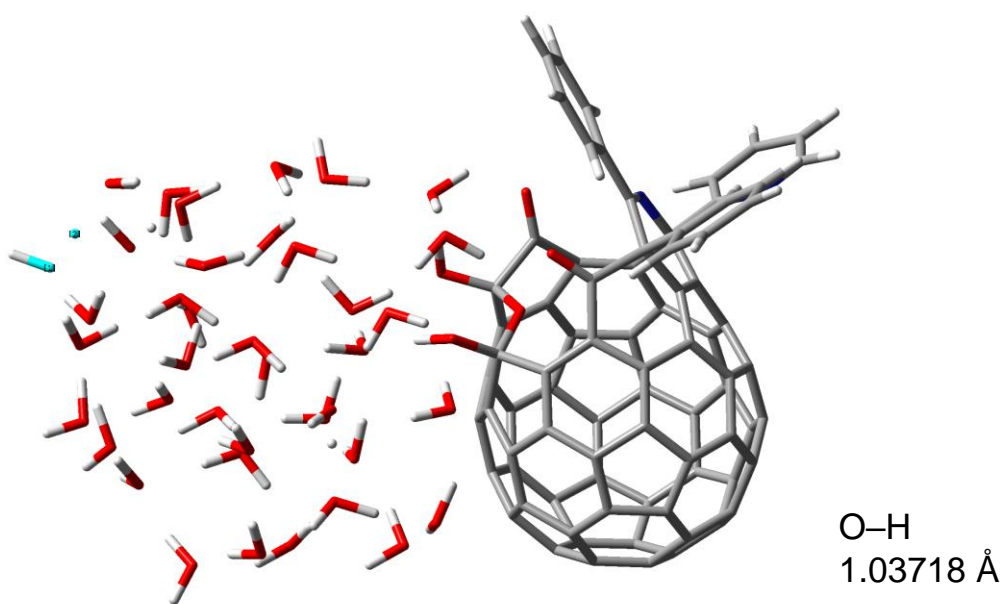

**Figure S10.** Simulated IR spectra of  $1 \cdot (\text{H}_2\text{O})_{39}\text{-C}$  (B3LYP-D3/6-31G(d,p)).

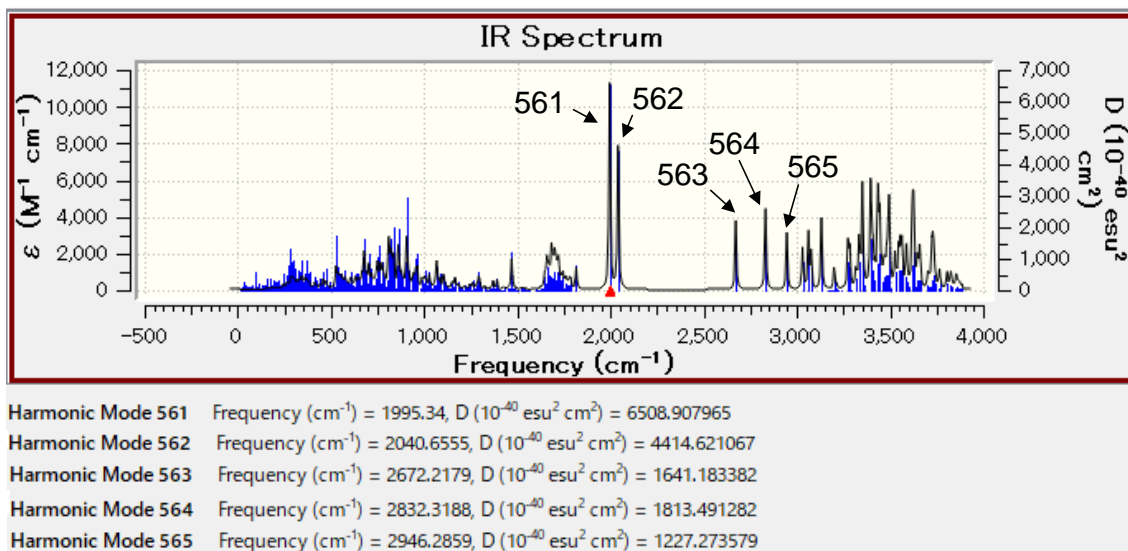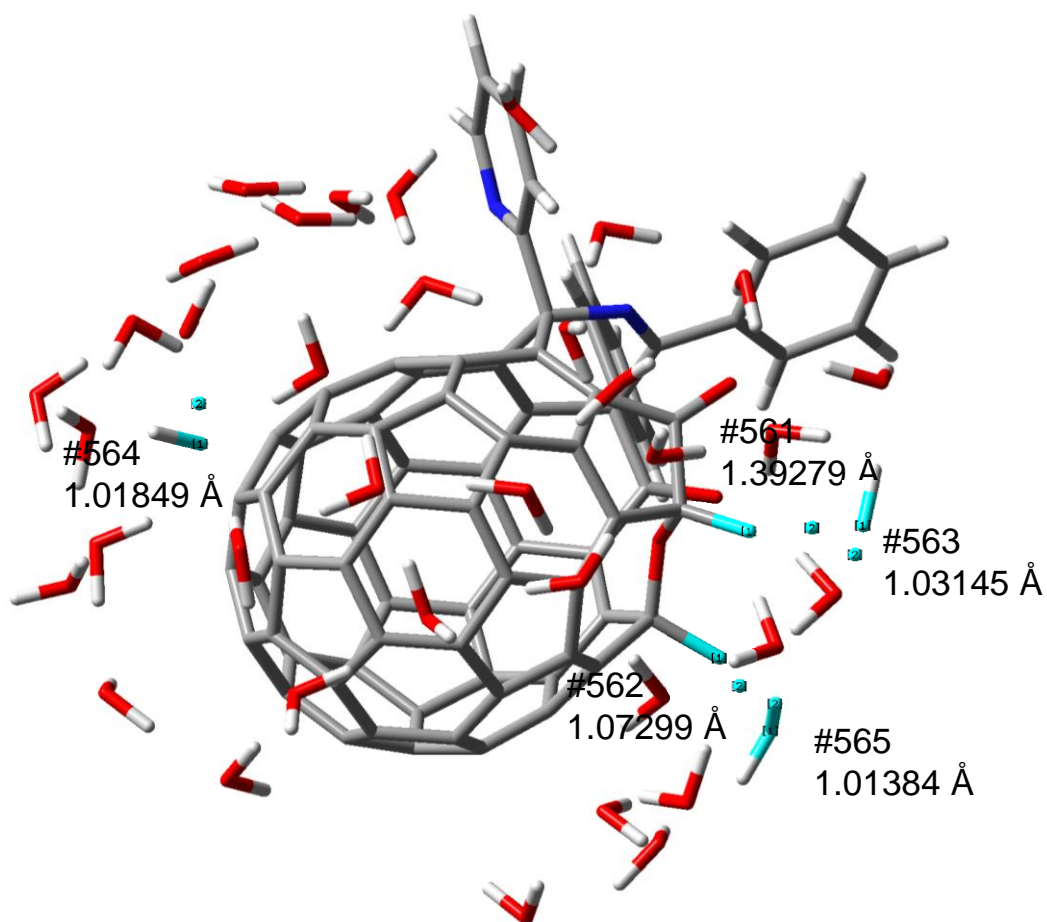

**Figure S11.** Simulated IR spectra of **1•(H<sub>2</sub>O)<sub>39</sub>-D** (B3LYP-D3/6-31G(d,p)).



**Table S7.** Optimized structure of **1•(H<sub>2</sub>O)<sub>39</sub>-A** (B3LYP-D3/6-31G(d,p))

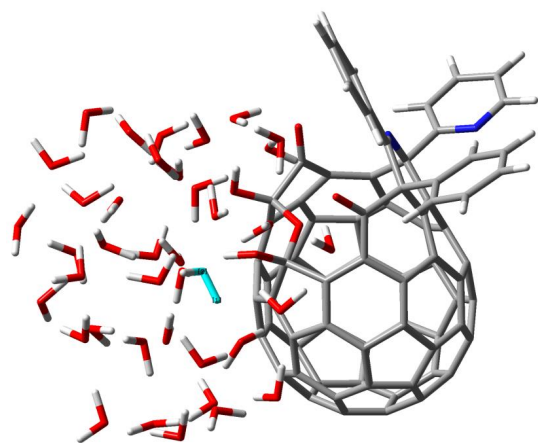

Standard orientation:

| Center Number | Atomic Number | Atomic Type | Coordinates (Angstroms) |           |           |
|---------------|---------------|-------------|-------------------------|-----------|-----------|
|               |               |             | X                       | Y         | Z         |
| 1             | 6             | 0           | -6.799982               | -3.387635 | -0.375703 |
| 2             | 6             | 0           | -7.010290               | -1.960866 | -0.558002 |
| 3             | 6             | 0           | -6.602885               | -1.352600 | -1.733928 |
| 4             | 6             | 0           | -5.946404               | -2.123937 | -2.775345 |
| 5             | 6             | 0           | -5.701252               | -3.483415 | -2.585408 |
| 6             | 6             | 0           | -6.138922               | -4.128616 | -1.359280 |
| 7             | 6             | 0           | -6.799692               | -1.288272 | 0.710994  |
| 8             | 6             | 0           | -6.000024               | -0.047282 | -1.677124 |
| 9             | 6             | 0           | -4.933083               | -1.272210 | -3.357513 |
| 10            | 6             | 0           | -4.411856               | -4.041824 | -2.955549 |
| 11            | 6             | 0           | -5.122904               | -5.093172 | -0.974602 |
| 12            | 6             | 0           | -6.510284               | -3.612818 | 1.023955  |
| 13            | 6             | 0           | -3.429908               | -3.213914 | -3.506890 |
| 14            | 6             | 0           | -3.700235               | -1.802660 | -3.718784 |
| 15            | 6             | 0           | -2.052099               | -3.333454 | -3.067727 |
| 16            | 6             | 0           | -2.500765               | -1.049624 | -3.418676 |
| 17            | 6             | 0           | -6.167408               | -0.027560 | 0.787085  |
| 18            | 6             | 0           | -4.983665               | 0.019509  | -2.706463 |
| 19            | 6             | 0           | -1.495651               | -1.998689 | -3.008227 |
| 20            | 6             | 0           | -3.846898               | 0.800001  | -2.503770 |
| 21            | 6             | 0           | -5.803301               | 0.627320  | -0.465929 |
| 22            | 6             | 0           | -4.048028               | -5.026964 | -1.951879 |
| 23            | 6             | 0           | -4.829902               | -5.298850 | 0.375120  |
| 24            | 6             | 0           | -5.327560               | 0.274766  | 1.958874  |
| 25            | 6             | 0           | -5.550794               | -4.561672 | 1.398808  |
| 26            | 6             | 0           | -6.553750               | -2.328540 | 1.695167  |
| 27            | 6             | 0           | -3.449251               | -5.428411 | 0.809062  |
| 28            | 6             | 0           | -4.630149               | -4.270583 | 2.479441  |
| 29            | 6             | 0           | -5.707949               | -2.071888 | 2.759528  |
| 30            | 6             | 0           | -2.547538               | 0.226460  | -2.834640 |
| 31            | 6             | 0           | -2.718294               | -5.139955 | -1.530863 |
| 32            | 6             | 0           | -4.815058               | 1.677795  | -0.451847 |
| 33            | 6             | 0           | -3.319580               | -4.778727 | 2.100000  |
| 34            | 6             | 0           | -4.727738               | -3.066557 | 3.172339  |
| 35            | 6             | 0           | -5.119135               | -0.761016 | 2.892559  |
| 36            | 6             | 0           | -3.817730               | -0.947950 | 3.477616  |
| 37            | 6             | 0           | -4.351743               | 1.360178  | 1.889423  |

|    |   |   |           |           |           |
|----|---|---|-----------|-----------|-----------|
| 38 | 6 | 0 | -3.890533 | 1.792689  | -1.452529 |
| 39 | 6 | 0 | -1.422226 | 2.021303  | -1.471726 |
| 40 | 6 | 0 | -3.533313 | -2.348816 | 3.559781  |
| 41 | 6 | 0 | -2.277111 | -2.790461 | 3.124682  |
| 42 | 6 | 0 | -1.270667 | -1.861359 | 2.646878  |
| 43 | 6 | 0 | -2.178003 | -4.024524 | 2.385863  |
| 44 | 6 | 0 | -1.706780 | -4.265251 | -2.089528 |
| 45 | 6 | 0 | -1.778900 | 1.833367  | 2.397669  |
| 46 | 6 | 0 | -2.415376 | -5.330959 | -0.120214 |
| 47 | 6 | 0 | -1.229259 | -4.550216 | 0.190111  |
| 48 | 6 | 0 | -3.123697 | 1.189980  | 2.513112  |
| 49 | 6 | 0 | -1.452426 | 0.639626  | -1.977203 |
| 50 | 6 | 0 | -0.608857 | -0.331660 | -1.456431 |
| 51 | 6 | 0 | -2.808785 | -0.064910 | 3.146413  |
| 52 | 6 | 0 | -1.486312 | -0.509405 | 2.811761  |
| 53 | 6 | 0 | -1.125035 | -3.868599 | 1.404117  |
| 54 | 6 | 0 | -0.585233 | -2.511795 | 1.494161  |
| 55 | 6 | 0 | -0.766504 | 0.638307  | 2.146649  |
| 56 | 6 | 0 | -0.800149 | -3.897473 | -1.011747 |
| 57 | 6 | 0 | -0.643339 | -1.649627 | -1.962481 |
| 58 | 6 | 0 | -0.006367 | -0.365930 | -0.026278 |
| 59 | 6 | 0 | -0.309995 | -2.597710 | -0.922780 |
| 60 | 6 | 0 | -0.164234 | -1.889595 | 0.323501  |
| 61 | 6 | 0 | -4.637599 | 2.451890  | 0.840294  |
| 62 | 6 | 0 | -2.756854 | 2.808171  | -1.423105 |
| 63 | 6 | 0 | -2.805314 | 3.688880  | -0.147068 |
| 64 | 7 | 0 | -3.605177 | 3.463016  | 0.825016  |
| 65 | 6 | 0 | -2.929582 | 3.664296  | -2.702619 |
| 66 | 6 | 0 | -5.920779 | 3.249952  | 1.163263  |
| 67 | 8 | 0 | -0.349371 | 2.541560  | -1.175940 |
| 68 | 8 | 0 | -1.443235 | 2.977722  | 2.609982  |
| 69 | 6 | 0 | -6.393641 | 3.406784  | 2.467419  |
| 70 | 6 | 0 | -7.522063 | 4.197656  | 2.675247  |
| 71 | 6 | 0 | -8.130775 | 4.804986  | 1.578107  |
| 72 | 6 | 0 | -7.571756 | 4.597607  | 0.316546  |
| 73 | 7 | 0 | -6.490152 | 3.840002  | 0.105513  |
| 74 | 6 | 0 | -4.068924 | 4.475922  | -2.779890 |
| 75 | 6 | 0 | -4.306144 | 5.240787  | -3.920084 |
| 76 | 6 | 0 | -3.417359 | 5.194656  | -4.996330 |
| 77 | 6 | 0 | -2.289917 | 4.376896  | -4.924694 |
| 78 | 6 | 0 | -2.042313 | 3.610102  | -3.784044 |
| 79 | 8 | 0 | -0.850514 | 0.509180  | 0.721174  |
| 80 | 8 | 0 | 0.498992  | 0.828251  | 2.629868  |
| 81 | 8 | 0 | 1.323675  | 0.033910  | -0.036502 |
| 82 | 6 | 0 | -1.875908 | 4.854746  | 0.033640  |
| 83 | 6 | 0 | -0.966078 | 5.305466  | -0.937492 |
| 84 | 6 | 0 | -0.087266 | 6.354701  | -0.671166 |
| 85 | 6 | 0 | -0.112453 | 6.995252  | 0.566467  |
| 86 | 6 | 0 | -1.034031 | 6.583030  | 1.532394  |
| 87 | 6 | 0 | -1.905261 | 5.531502  | 1.269280  |
| 88 | 1 | 0 | -5.889863 | 2.919533  | 3.294238  |
| 89 | 1 | 0 | -7.917872 | 4.336198  | 3.676948  |
| 90 | 1 | 0 | -9.013020 | 5.426095  | 1.692531  |
| 91 | 1 | 0 | -8.011015 | 5.059163  | -0.565413 |
| 92 | 1 | 0 | -4.775185 | 4.490421  | -1.953231 |
| 93 | 1 | 0 | -5.189703 | 5.870483  | -3.968253 |
| 94 | 1 | 0 | -3.604112 | 5.790003  | -5.885089 |
| 95 | 1 | 0 | -1.593196 | 4.331341  | -5.756268 |
| 96 | 1 | 0 | -1.143950 | 3.000309  | -3.749455 |
| 97 | 1 | 0 | 0.819905  | 1.738739  | 2.421174  |

|     |   |   |           |           |           |     |   |   |          |           |           |
|-----|---|---|-----------|-----------|-----------|-----|---|---|----------|-----------|-----------|
| 98  | 1 | 0 | 1.789421  | -0.386944 | 0.743684  | 161 | 8 | 0 | 3.878849 | 2.928208  | -3.154651 |
| 99  | 1 | 0 | -0.915001 | 4.832210  | -1.904547 | 162 | 1 | 0 | 4.323143 | 2.183885  | -2.665064 |
| 100 | 1 | 0 | 0.636932  | 6.641766  | -1.426999 | 163 | 1 | 0 | 5.592205 | 3.224723  | -3.744608 |
| 101 | 1 | 0 | 0.578077  | 7.806777  | 0.777815  | 164 | 8 | 0 | 7.544385 | -2.383766 | 2.313371  |
| 102 | 1 | 0 | -1.069776 | 7.077178  | 2.499051  | 165 | 1 | 0 | 6.916625 | -3.112073 | 2.487030  |
| 103 | 1 | 0 | -2.604734 | 5.194114  | 2.021708  | 166 | 1 | 0 | 6.950651 | -1.610097 | 2.138359  |
| 104 | 8 | 0 | 2.533524  | -1.192798 | 1.934999  | 167 | 8 | 0 | 7.036888 | -1.052261 | 4.823409  |
| 105 | 1 | 0 | 3.202857  | -0.581939 | 2.302127  | 168 | 1 | 0 | 7.483271 | -1.578662 | 4.135468  |
| 106 | 1 | 0 | 2.001360  | -1.432763 | 2.742775  | 169 | 1 | 0 | 7.025879 | -0.151633 | 4.451218  |
| 107 | 8 | 0 | 2.201413  | -4.767401 | -0.916829 | 170 | 8 | 0 | 7.277028 | 1.704303  | 3.727659  |
| 108 | 1 | 0 | 3.075946  | -5.184776 | -0.983312 | 171 | 1 | 0 | 7.577586 | 2.203720  | 4.498753  |
| 109 | 1 | 0 | 2.127304  | -4.493170 | 0.016421  | 172 | 1 | 0 | 6.443550 | 2.166781  | 3.439535  |
| 110 | 8 | 0 | 1.807127  | -3.359765 | -3.285008 | 173 | 8 | 0 | 7.937900 | 1.810650  | 1.093264  |
| 111 | 1 | 0 | 1.868910  | -3.796304 | -2.404670 | 174 | 1 | 0 | 8.002927 | 1.869749  | 2.072469  |
| 112 | 1 | 0 | 1.768535  | -2.403831 | -3.097668 | 175 | 1 | 0 | 7.267507 | -2.479937 | 0.809029  |
| 113 | 8 | 0 | 2.088313  | -0.532449 | -2.714698 | 176 | 8 | 0 | 8.939393 | 0.240135  | -0.790192 |
| 114 | 1 | 0 | 2.158520  | -0.386980 | -1.751397 | 177 | 1 | 0 | 9.893267 | 0.132118  | -0.686643 |
| 115 | 1 | 0 | 1.668077  | 0.299166  | -3.055436 | 178 | 1 | 0 | 8.646227 | 0.824388  | -0.042581 |
| 116 | 8 | 0 | 1.275390  | 1.932676  | -3.387461 | 179 | 8 | 0 | 7.758680 | -2.293034 | -0.411340 |
| 117 | 1 | 0 | 2.152517  | 2.358609  | -3.486792 | 180 | 1 | 0 | 7.890078 | -2.434725 | 0.557321  |
| 118 | 1 | 0 | 0.953263  | 2.193662  | -2.507334 | 181 | 1 | 0 | 8.123913 | -1.405567 | -0.612799 |
| 119 | 8 | 0 | 1.606256  | -2.225815 | 4.183028  | 182 | 8 | 0 | 5.074763 | -3.609267 | 2.427483  |
| 120 | 1 | 0 | 2.480825  | -2.267408 | 4.610841  | 183 | 1 | 0 | 4.280951 | -4.176312 | 2.420957  |
| 121 | 1 | 0 | 1.093095  | -1.542714 | 4.682121  | 184 | 1 | 0 | 5.043233 | -3.211087 | 1.517433  |
| 122 | 8 | 0 | 0.394809  | -0.116645 | 5.409226  | 185 | 8 | 0 | 4.491891 | -2.100384 | 4.603471  |
| 123 | 1 | 0 | 0.536659  | -0.067410 | 6.362843  | 186 | 1 | 0 | 5.382127 | -1.849669 | 4.943841  |
| 124 | 1 | 0 | 0.909059  | 0.639610  | 5.047856  | 187 | 1 | 0 | 4.692094 | -2.622175 | 3.785093  |
| 125 | 8 | 0 | 2.239534  | 1.874832  | 4.713590  | 188 | 8 | 0 | 4.231650 | 0.303850  | 3.611779  |
| 126 | 1 | 0 | 2.808470  | 1.300355  | 4.159167  | 189 | 1 | 0 | 4.269918 | -0.599027 | 4.044107  |
| 127 | 1 | 0 | 1.916148  | 2.561639  | 4.091842  | 190 | 1 | 0 | 4.999257 | 0.298829  | 2.993755  |
| 128 | 8 | 0 | 2.415968  | -3.929947 | 1.791840  | 191 | 8 | 0 | 6.102280 | -0.176106 | 1.727293  |
| 129 | 1 | 0 | 1.755104  | -3.908713 | 2.500732  | 192 | 1 | 0 | 6.756518 | 0.493109  | 1.438412  |
| 130 | 1 | 0 | 2.615192  | -2.976859 | 1.663210  | 193 | 1 | 0 | 5.434145 | -0.249125 | 0.987152  |
| 131 | 8 | 0 | 1.257370  | 3.453090  | 2.686942  | 194 | 8 | 0 | 4.248451 | -0.284970 | -0.128404 |
| 132 | 1 | 0 | 1.557091  | 3.788095  | 1.809928  | 195 | 1 | 0 | 4.245321 | -1.269189 | -0.219210 |
| 133 | 1 | 0 | 0.299068  | 3.628562  | 2.722502  | 196 | 1 | 0 | 4.697870 | 0.099800  | -0.932741 |
| 134 | 8 | 0 | 7.616223  | -4.382663 | -2.152131 | 197 | 8 | 0 | 5.050767 | -2.759635 | -0.103664 |
| 135 | 1 | 0 | 8.430431  | -4.899810 | -2.149676 | 198 | 1 | 0 | 5.973333 | -2.498564 | -0.321307 |
| 136 | 1 | 0 | 7.776068  | -3.619463 | -1.548099 | 199 | 1 | 0 | 4.904573 | -3.615214 | -0.605165 |
| 137 | 8 | 0 | 6.731217  | -3.584424 | -4.819181 | 200 | 8 | 0 | 5.896762 | 3.503392  | 0.482630  |
| 138 | 1 | 0 | 7.138987  | -3.814710 | -3.963994 | 201 | 1 | 0 | 5.753146 | 3.830760  | 1.395631  |
| 139 | 1 | 0 | 6.926891  | -2.628526 | -4.948399 | 202 | 1 | 0 | 5.095309 | 2.904515  | 0.393114  |
| 140 | 8 | 0 | 4.960995  | -4.991593 | -1.474805 | 203 | 8 | 0 | 5.913151 | 5.256276  | -1.505968 |
| 141 | 1 | 0 | 5.920392  | -5.143165 | -1.566818 | 204 | 1 | 0 | 5.920645 | 4.627465  | -0.731273 |
| 142 | 1 | 0 | 4.738783  | -4.504317 | -2.317504 | 205 | 1 | 0 | 6.465937 | 6.003378  | -1.245260 |
| 143 | 8 | 0 | 4.447772  | -3.461663 | -3.535752 | 206 | 8 | 0 | 1.816577 | 3.775926  | 0.112344  |
| 144 | 1 | 0 | 5.092816  | -3.647315 | -4.268906 | 207 | 1 | 0 | 0.973152 | 3.493452  | -0.280866 |
| 145 | 1 | 0 | 3.485442  | -3.553998 | -3.762500 | 208 | 1 | 0 | 2.243913 | 4.417112  | -0.523321 |
| 146 | 8 | 0 | 6.932242  | -0.807484 | -5.113518 | 209 | 8 | 0 | 3.067388 | 5.141318  | -1.761309 |
| 147 | 1 | 0 | 5.978378  | -0.656635 | -4.987831 | 210 | 1 | 0 | 3.952664 | 5.484765  | -1.549817 |
| 148 | 1 | 0 | 7.349329  | -0.216092 | -4.463256 | 211 | 1 | 0 | 3.285268 | 4.349655  | -2.306294 |
| 149 | 8 | 0 | 7.751656  | 1.170419  | -3.107349 | 212 | 8 | 0 | 3.708485 | 2.104221  | 0.876221  |
| 150 | 1 | 0 | 8.357834  | 1.023394  | -2.354523 | 213 | 1 | 0 | 3.654528 | 1.176876  | 0.560304  |
| 151 | 1 | 0 | 7.631925  | 2.126883  | -3.274952 | 214 | 1 | 0 | 2.923577 | 2.595668  | 0.520008  |
| 152 | 8 | 0 | 6.630054  | 3.674677  | -3.625290 | 215 | 8 | 0 | 4.773802 | 2.441835  | 5.571711  |
| 153 | 1 | 0 | 6.940066  | 4.232431  | -4.349248 | 216 | 1 | 0 | 4.933328 | 1.548650  | 5.219578  |
| 154 | 1 | 0 | 6.440659  | 4.286747  | -2.873686 | 217 | 1 | 0 | 3.794428 | 2.438225  | 5.620365  |
| 155 | 8 | 0 | 4.442099  | -0.845558 | -3.895053 | 218 | 8 | 0 | 5.104329 | 3.122366  | 3.010926  |
| 156 | 1 | 0 | 4.577545  | -1.795550 | -3.636512 | 219 | 1 | 0 | 4.843430 | 3.115364  | 3.966746  |
| 157 | 1 | 0 | 3.497318  | -0.693178 | -3.648043 | 220 | 1 | 0 | 4.422272 | 2.616305  | 2.518634  |
| 158 | 8 | 0 | 5.263376  | 0.871342  | -2.197467 |     |   |   |          |           |           |
| 159 | 1 | 0 | 6.224498  | 0.994076  | -2.394131 |     |   |   |          |           |           |
| 160 | 1 | 0 | 4.983787  | 0.177840  | -2.884796 |     |   |   |          |           |           |

The total electronic energy was calculated to be -6525.3114175 Hartree.

**Table S8.** Optimized structure of  $1 \cdot (\text{H}_2\text{O})_{39} \cdot \text{B}$  (B3LYP-D3/6-31G(d,p))

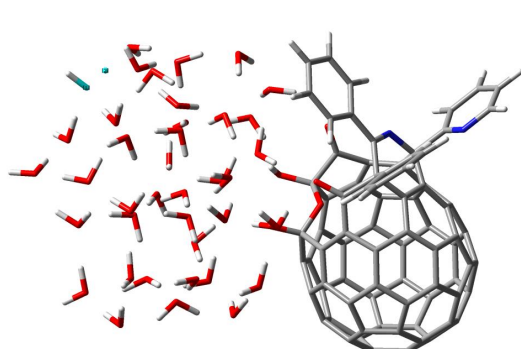

Standard orientation:

| Center Number | Atomic Number | Atomic Type | Coordinates (Angstroms) |           |           |
|---------------|---------------|-------------|-------------------------|-----------|-----------|
|               |               |             | X                       | Y         | Z         |
| 1             | 6             | 0           | 7.873856                | -2.059039 | -0.546642 |
| 2             | 6             | 0           | 7.728515                | -0.642147 | -0.255998 |
| 3             | 6             | 0           | 7.365011                | -0.237764 | 1.018356  |
| 4             | 6             | 0           | 7.106689                | -1.217296 | 2.059024  |
| 5             | 6             | 0           | 7.203035                | -2.578815 | 1.773248  |
| 6             | 6             | 0           | 7.595523                | -3.008083 | 0.441266  |
| 7             | 6             | 0           | 7.151027                | 0.018436  | -1.412474 |
| 8             | 6             | 0           | 6.439702                | 0.853039  | 1.172438  |
| 9             | 6             | 0           | 6.008965                | -0.711128 | 2.852956  |
| 10            | 6             | 0           | 6.181314                | -3.489727 | 2.259837  |
| 11            | 6             | 0           | 6.820975                | -4.190989 | 0.106970  |
| 12            | 6             | 0           | 7.434642                | -2.274424 | -1.908848 |
| 13            | 6             | 0           | 5.116076                | -2.995825 | 3.018433  |
| 14            | 6             | 0           | 5.031806                | -1.578671 | 3.325308  |
| 15            | 6             | 0           | 3.767995                | -3.466118 | 2.764744  |
| 16            | 6             | 0           | 3.643326                | -1.169979 | 3.266494  |
| 17            | 6             | 0           | 6.207609                | 1.060996  | -1.277980 |
| 18            | 6             | 0           | 5.614046                | 0.579200  | 2.330261  |
| 19            | 6             | 0           | 2.873874                | -2.337603 | 2.915214  |
| 20            | 6             | 0           | 4.293744                | 1.027143  | 2.360098  |
| 21            | 6             | 0           | 5.886980                | 1.516978  | 0.071475  |
| 22            | 6             | 0           | 5.936368                | -4.478926 | 1.224633  |
| 23            | 6             | 0           | 6.380909                | -4.391316 | -1.203265 |
| 24            | 6             | 0           | 5.142337                | 1.187695  | -2.287626 |
| 25            | 6             | 0           | 6.709921                | -3.426499 | -2.238690 |
| 26            | 6             | 0           | 7.031897                | -0.991100 | -2.450457 |
| 27            | 6             | 0           | 5.032016                | -4.869964 | -1.453484 |
| 28            | 6             | 0           | 5.583870                | -3.336786 | -3.146289 |
| 29            | 6             | 0           | 5.988793                | -0.915628 | -3.357035 |
| 30            | 6             | 0           | 3.256987                | 0.100782  | 2.805527  |
| 31            | 6             | 0           | 4.633947                | -4.930137 | 0.981578  |
| 32            | 6             | 0           | 4.670425                | 2.256502  | 0.295739  |
| 33            | 6             | 0           | 4.531416                | -4.207087 | -2.642488 |
| 34            | 6             | 0           | 5.249621                | -2.114825 | -3.723727 |
| 35            | 6             | 0           | 5.064313                | 0.189450  | -3.278944 |
| 36            | 6             | 0           | 3.779303                | -0.311522 | -3.690155 |
| 37            | 6             | 0           | 3.941636                | 1.959968  | -1.978774 |
| 38            | 6             | 0           | 3.913588                | 2.056672  | 1.417192  |
| 39            | 6             | 0           | 1.504174                | 1.579341  | 1.733273  |
| 40            | 6             | 0           | 3.862391                | -1.730426 | -3.866609 |
| 41            | 6             | 0           | 2.852216                | -2.524515 | -3.309065 |
| 42            | 6             | 0           | 1.723546                | -1.936592 | -2.610184 |

|     |   |   |           |           |           |
|-----|---|---|-----------|-----------|-----------|
| 43  | 6 | 0 | 3.201407  | -3.779229 | -2.690229 |
| 44  | 6 | 0 | 3.530243  | -4.402395 | 1.758059  |
| 45  | 6 | 0 | 1.286633  | 1.735996  | -2.038649 |
| 46  | 6 | 0 | 4.170561  | -5.114205 | -0.385631 |
| 47  | 6 | 0 | 2.786693  | -4.675798 | -0.450906 |
| 48  | 6 | 0 | 2.713598  | 1.500258  | -2.435615 |
| 49  | 6 | 0 | 1.972526  | 0.239462  | 2.145424  |
| 50  | 6 | 0 | 1.345227  | -0.904210 | 1.670385  |
| 51  | 6 | 0 | 2.639694  | 0.243537  | -3.140555 |
| 52  | 6 | 0 | 1.544346  | -0.567204 | -2.680693 |
| 53  | 6 | 0 | 2.315317  | -3.977106 | -1.563981 |
| 54  | 6 | 0 | 1.423858  | -2.823785 | -1.443696 |
| 55  | 6 | 0 | 0.689407  | 0.293832  | -1.782078 |
| 56  | 6 | 0 | 2.394984  | -4.243190 | 0.859996  |
| 57  | 6 | 0 | 1.795180  | -2.187931 | 2.045714  |
| 58  | 6 | 0 | 0.551823  | -1.027124 | 0.349147  |
| 59  | 6 | 0 | 1.564145  | -3.132738 | 0.972744  |
| 60  | 6 | 0 | 1.037528  | -2.423121 | -0.168451 |
| 61  | 6 | 0 | 4.102758  | 3.026801  | -0.879520 |
| 62  | 6 | 0 | 2.556464  | 2.714213  | 1.627748  |
| 63  | 6 | 0 | 2.190370  | 3.663940  | 0.456376  |
| 64  | 7 | 0 | 2.865415  | 3.723523  | -0.627977 |
| 65  | 6 | 0 | 2.648576  | 3.484623  | 2.965108  |
| 66  | 6 | 0 | 5.073091  | 4.155257  | -1.295821 |
| 67  | 8 | 0 | 0.313771  | 1.801856  | 1.544228  |
| 68  | 8 | 0 | 0.613226  | 2.739064  | -2.042041 |
| 69  | 6 | 0 | 5.271499  | 4.512653  | -2.630889 |
| 70  | 6 | 0 | 6.110138  | 5.588872  | -2.913974 |
| 71  | 6 | 0 | 6.712938  | 6.269574  | -1.857262 |
| 72  | 6 | 0 | 6.438599  | 5.842894  | -0.557356 |
| 73  | 7 | 0 | 5.636422  | 4.811065  | -0.274033 |
| 74  | 6 | 0 | 3.538734  | 4.564459  | 3.026964  |
| 75  | 6 | 0 | 3.692616  | 5.276423  | 4.214676  |
| 76  | 6 | 0 | 2.969646  | 4.911094  | 5.352562  |
| 77  | 6 | 0 | 2.091103  | 3.829395  | 5.294169  |
| 78  | 6 | 0 | 1.927461  | 3.114043  | 4.106154  |
| 79  | 8 | 0 | 1.062290  | 0.069893  | -0.431315 |
| 80  | 8 | 0 | -0.662171 | 0.200194  | -2.013447 |
| 81  | 8 | 0 | -0.796857 | -0.962526 | 0.589345  |
| 82  | 6 | 0 | 0.988199  | 4.561619  | 0.507177  |
| 83  | 6 | 0 | 0.076648  | 4.622267  | 1.573380  |
| 84  | 6 | 0 | -1.047242 | 5.445892  | 1.510009  |
| 85  | 6 | 0 | -1.281061 | 6.242314  | 0.390842  |
| 86  | 6 | 0 | -0.370152 | 6.211764  | -0.668860 |
| 87  | 6 | 0 | 0.748211  | 5.388439  | -0.609796 |
| 88  | 1 | 0 | 4.781296  | 3.959225  | -3.423550 |
| 89  | 1 | 0 | 6.288590  | 5.889675  | -3.942094 |
| 90  | 1 | 0 | 7.375562  | 7.111061  | -2.030898 |
| 91  | 1 | 0 | 6.882169  | 6.351244  | 0.296336  |
| 92  | 1 | 0 | 4.117926  | 4.831669  | 2.146119  |
| 93  | 1 | 0 | 4.381408  | 6.115357  | 4.251600  |
| 94  | 1 | 0 | 3.092270  | 5.465116  | 6.278509  |
| 95  | 1 | 0 | 1.525790  | 3.536218  | 6.173753  |
| 96  | 1 | 0 | 1.220751  | 2.288810  | 4.079753  |
| 97  | 1 | 0 | -1.167246 | 0.711907  | -1.295257 |
| 98  | 1 | 0 | -1.304520 | -1.365029 | -0.170562 |
| 99  | 1 | 0 | 0.215861  | 4.016150  | 2.453323  |
| 100 | 1 | 0 | -1.747178 | 5.452541  | 2.339864  |
| 101 | 1 | 0 | -2.172037 | 6.856577  | 0.326494  |
| 102 | 1 | 0 | -0.539259 | 6.825916  | -1.548585 |
| 103 | 1 | 0 | 1.446919  | 5.345914  | -1.434829 |
| 104 | 8 | 0 | -2.327268 | -1.983559 | -1.266806 |

|     |   |   |           |           |           |     |   |   |            |           |           |
|-----|---|---|-----------|-----------|-----------|-----|---|---|------------|-----------|-----------|
| 105 | 1 | 0 | -3.113883 | -1.477740 | -0.935082 | 164 | 8 | 0 | -10.377059 | -1.701629 | -0.406667 |
| 106 | 1 | 0 | -2.169676 | -1.683312 | -2.194903 | 165 | 1 | 0 | -11.278728 | -1.979202 | -0.607195 |
| 107 | 8 | 0 | -2.227402 | -4.650882 | -1.110159 | 166 | 1 | 0 | -9.980524  | -1.406620 | -1.264551 |
| 108 | 1 | 0 | -3.109883 | -4.953276 | -0.820484 | 167 | 8 | 0 | -9.150338  | -0.909663 | -2.702370 |
| 109 | 1 | 0 | -2.311402 | -3.665583 | -1.126321 | 168 | 1 | 0 | -9.569284  | -1.141649 | -3.541849 |
| 110 | 8 | 0 | -1.281044 | -4.650873 | 1.673705  | 169 | 1 | 0 | -9.162607  | 0.092657  | -2.658221 |
| 111 | 1 | 0 | -1.358083 | -4.577968 | 0.703409  | 170 | 8 | 0 | -9.137115  | 1.672669  | -2.318252 |
| 112 | 1 | 0 | -1.052973 | -3.764639 | 2.044323  | 171 | 1 | 0 | -10.009850 | 2.080675  | -2.253600 |
| 113 | 8 | 0 | -0.884584 | -2.500777 | 3.310585  | 172 | 1 | 0 | -8.534336  | 2.365575  | -2.872724 |
| 114 | 1 | 0 | -1.572233 | -2.670322 | 3.973748  | 173 | 8 | 0 | -7.923274  | 1.482703  | 0.060700  |
| 115 | 1 | 0 | -0.925100 | -1.523551 | 3.223810  | 174 | 1 | 0 | -8.387624  | 1.501816  | -0.816208 |
| 116 | 8 | 0 | -0.935228 | 0.308012  | 3.564483  | 175 | 1 | 0 | -8.023669  | 2.406110  | 0.392138  |
| 117 | 1 | 0 | -1.765782 | 0.795108  | 3.718792  | 176 | 8 | 0 | -8.507945  | -0.651299 | 1.526010  |
| 118 | 1 | 0 | -0.666354 | 0.633138  | 2.689701  | 177 | 1 | 0 | -9.433600  | -0.813733 | 1.282211  |
| 119 | 8 | 0 | -2.431621 | -1.491184 | -3.923543 | 178 | 1 | 0 | -8.251033  | 0.142520  | 0.984826  |
| 120 | 1 | 0 | -3.405332 | -1.623863 | -3.901741 | 179 | 8 | 0 | -8.163632  | -3.088231 | 0.345458  |
| 121 | 1 | 0 | -2.267674 | -0.613259 | -4.300574 | 180 | 1 | 0 | -9.065840  | -2.909066 | 0.007237  |
| 122 | 8 | 0 | -2.201180 | 1.520763  | -3.894371 | 181 | 1 | 0 | -8.010623  | -2.286360 | 0.895729  |
| 123 | 1 | 0 | -3.079642 | 1.215001  | -3.574592 | 182 | 8 | 0 | -4.902813  | -2.630225 | -3.692323 |
| 124 | 1 | 0 | -1.548118 | 1.073130  | -3.320395 | 183 | 1 | 0 | -4.315492  | -3.419730 | -3.827672 |
| 125 | 8 | 0 | -2.073886 | 3.647113  | -2.110116 | 184 | 1 | 0 | -5.231228  | -2.683629 | -2.767659 |
| 126 | 1 | 0 | -2.158747 | 3.029808  | -2.877556 | 185 | 8 | 0 | -6.692253  | -0.753049 | -4.162464 |
| 127 | 1 | 0 | -1.121059 | 3.814730  | -2.037827 | 186 | 1 | 0 | -7.372245  | -0.970008 | -3.500709 |
| 128 | 8 | 0 | -2.837814 | -4.343026 | -3.867948 | 187 | 1 | 0 | -6.135099  | -1.561508 | -4.262239 |
| 129 | 1 | 0 | -2.279308 | -3.579259 | -4.087921 | 188 | 8 | 0 | -4.744819  | 0.918597  | -3.159488 |
| 130 | 1 | 0 | -2.550322 | -4.600998 | -2.964741 | 189 | 1 | 0 | -5.364740  | 0.188235  | -3.377143 |
| 131 | 8 | 0 | -2.029433 | 1.574141  | -0.276340 | 190 | 1 | 0 | -4.979341  | 1.222507  | -2.259856 |
| 132 | 1 | 0 | -1.397167 | 1.688669  | 0.451437  | 191 | 8 | 0 | -5.261546  | 1.631522  | -0.528620 |
| 133 | 1 | 0 | -2.099695 | 2.442288  | -0.732425 | 192 | 1 | 0 | -6.197027  | 1.476875  | -0.258145 |
| 134 | 8 | 0 | -7.196621 | -5.483090 | 1.183608  | 193 | 1 | 0 | -4.797357  | 0.747352  | -0.382805 |
| 135 | 1 | 0 | -7.849587 | -6.176994 | 1.034604  | 194 | 8 | 0 | -4.402496  | -0.769143 | -0.168017 |
| 136 | 1 | 0 | -7.630944 | -4.630429 | 0.938741  | 195 | 1 | 0 | -5.094221  | -1.421151 | -0.456663 |
| 137 | 8 | 0 | -5.833763 | -5.427802 | 3.687418  | 196 | 1 | 0 | -4.293750  | -0.851355 | 0.820701  |
| 138 | 1 | 0 | -6.403832 | -5.475831 | 2.896503  | 197 | 8 | 0 | -5.914359  | -2.681644 | -1.153098 |
| 139 | 1 | 0 | -6.045416 | -4.568346 | 4.098433  | 198 | 1 | 0 | -6.845967  | -2.778999 | -0.867026 |
| 140 | 8 | 0 | -4.813204 | -4.763195 | -0.028225 | 199 | 1 | 0 | -5.455786  | -3.472882 | -0.735376 |
| 141 | 1 | 0 | -5.573178 | -5.330496 | 0.203512  | 200 | 8 | 0 | -7.800403  | 4.133979  | 0.410510  |
| 142 | 1 | 0 | -4.423663 | -4.527275 | 0.866665  | 201 | 1 | 0 | -8.463257  | 4.818591  | 0.263215  |
| 143 | 8 | 0 | -3.762886 | -4.417871 | 2.331719  | 202 | 1 | 0 | -7.131584  | 4.208164  | -0.339644 |
| 144 | 1 | 0 | -4.294681 | -5.043471 | 2.881383  | 203 | 8 | 0 | -6.175081  | 3.979475  | 2.667173  |
| 145 | 1 | 0 | -2.808236 | -4.710724 | 2.173805  | 204 | 1 | 0 | -6.871309  | 4.102968  | 1.994041  |
| 146 | 8 | 0 | -6.180632 | -2.839942 | 4.927083  | 205 | 1 | 0 | -5.344848  | 3.907596  | 2.132952  |
| 147 | 1 | 0 | -6.522222 | -2.837790 | 5.828822  | 206 | 8 | 0 | -3.904079  | 5.304406  | -0.934962 |
| 148 | 1 | 0 | -6.494892 | -2.000680 | 4.508080  | 207 | 1 | 0 | -3.212703  | 4.883702  | -1.492903 |
| 149 | 8 | 0 | -6.818031 | -0.540698 | 3.658882  | 208 | 1 | 0 | -3.771459  | 4.855580  | -0.073937 |
| 150 | 1 | 0 | -7.568064 | -0.530129 | 3.026595  | 209 | 8 | 0 | -3.990410  | 3.454743  | 1.151941  |
| 151 | 1 | 0 | -6.641229 | 0.386152  | 3.955759  | 210 | 1 | 0 | -4.356746  | 2.765838  | 0.554504  |
| 152 | 8 | 0 | -5.973754 | 1.959740  | 4.250641  | 211 | 1 | 0 | -3.497417  | 2.932217  | 1.827735  |
| 153 | 1 | 0 | -6.113289 | 2.352971  | 5.120953  | 212 | 8 | 0 | -6.072333  | 4.049837  | -1.558944 |
| 154 | 1 | 0 | -6.158893 | 2.710516  | 3.593088  | 213 | 1 | 0 | -5.674569  | 3.173475  | -1.383710 |
| 155 | 8 | 0 | -3.529353 | -2.493752 | 4.138729  | 214 | 1 | 0 | -5.281741  | 4.671077  | -1.418208 |
| 156 | 1 | 0 | -3.593162 | -3.206524 | 3.447557  | 215 | 8 | 0 | -6.332525  | 1.861022  | -5.238398 |
| 157 | 1 | 0 | -4.330625 | -2.626779 | 4.681148  | 216 | 1 | 0 | -6.661431  | 0.945545  | -5.167814 |
| 158 | 8 | 0 | -4.347038 | -0.668721 | 2.440238  | 217 | 1 | 0 | -5.537708  | 1.811041  | -4.671752 |
| 159 | 1 | 0 | -5.275137 | -0.639979 | 2.764517  | 218 | 8 | 0 | -7.781626  | 3.311909  | -3.566036 |
| 160 | 1 | 0 | -3.899670 | -1.312410 | 3.064788  | 219 | 1 | 0 | -7.264949  | 2.831252  | -4.276515 |
| 161 | 8 | 0 | -3.343226 | 1.717862  | 3.154155  | 220 | 1 | 0 | -7.117893  | 3.719671  | -2.964017 |
| 162 | 1 | 0 | -3.630066 | 0.859699  | 2.750986  |     |   |   |            |           |           |
| 163 | 1 | 0 | -4.086706 | 1.899740  | 3.761093  |     |   |   |            |           |           |

-----  
The total electronic energy was calculated to be -6525.2994634 Hartree.

**Table S9.** Optimized structure of  $1 \cdot (\text{H}_2\text{O})_{39} \cdot \text{C}$  (B3LYP-D3/6-31G(d,p))

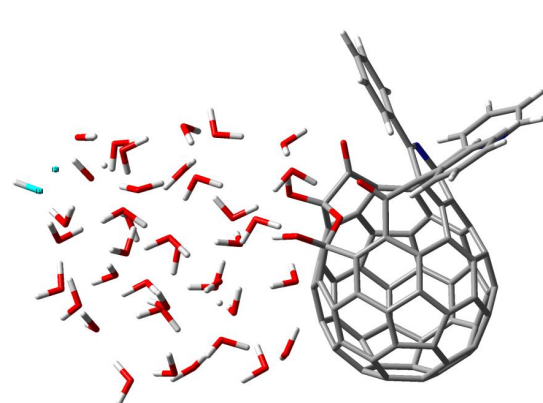

| Standard orientation: |               |             |                         |           |           |    |   |   |           |           |           |
|-----------------------|---------------|-------------|-------------------------|-----------|-----------|----|---|---|-----------|-----------|-----------|
| Center Number         | Atomic Number | Atomic Type | Coordinates (Angstroms) |           |           |    |   |   |           |           |           |
|                       |               |             | X                       | Y         | Z         |    |   |   |           |           |           |
| 1                     | 6             | 0           | 6.889914                | -3.840461 | -0.587555 | 40 | 6 | 0 | 3.052824  | -2.230821 | -3.731662 |
| 2                     | 6             | 0           | 7.309945                | -2.459077 | -0.419598 | 41 | 6 | 0 | 1.864921  | -2.547452 | -3.060441 |
| 3                     | 6             | 0           | 7.227432                | -1.864923 | 0.829045  | 42 | 6 | 0 | 1.100875  | -1.532531 | -2.361080 |
| 4                     | 6             | 0           | 6.701666                | -2.602612 | 1.965093  | 43 | 6 | 0 | 1.761907  | -3.795818 | -2.347482 |
| 5                     | 6             | 0           | 6.255081                | -3.913030 | 1.798513  | 44 | 6 | 0 | 2.178972  | -4.193972 | 2.117219  |
| 6                     | 6             | 0           | 6.352608                | -4.545027 | 0.493464  | 45 | 6 | 0 | 2.096787  | 2.066487  | -2.100108 |
| 7                     | 6             | 0           | 6.935018                | -1.705403 | -1.602395 | 46 | 6 | 0 | 2.334682  | -5.240094 | 0.020912  |
| 8                     | 6             | 0           | 6.793967                | -0.496759 | 0.927057  | 47 | 6 | 0 | 1.217851  | -4.312172 | -0.019321 |
| 9                     | 6             | 0           | 5.939195                | -1.666648 | 2.760728  | 48 | 6 | 0 | 3.307148  | 1.285715  | -2.539823 |
| 10                    | 6             | 0           | 5.007747                | -4.332752 | 2.413382  | 49 | 6 | 0 | 2.511790  | 0.708198  | 2.167806  |
| 11                    | 6             | 0           | 5.168080                | -5.364155 | 0.304255  | 50 | 6 | 0 | 1.456390  | -0.130468 | 1.825915  |
| 12                    | 6             | 0           | 6.297866                | -3.961491 | -1.902359 | 51 | 6 | 0 | 2.724132  | 0.102046  | -3.122231 |
| 13                    | 6             | 0           | 4.268463                | -3.422240 | 3.174559  | 52 | 6 | 0 | 1.457048  | -0.211012 | -2.529644 |
| 14                    | 6             | 0           | 4.747806                | -2.063799 | 3.355402  | 53 | 6 | 0 | 0.956465  | -3.565417 | -1.167030 |
| 15                    | 6             | 0           | 2.826904                | -3.357417 | 3.024512  | 54 | 6 | 0 | 0.577614  | -2.154118 | -1.109497 |
| 16                    | 6             | 0           | 3.614488                | -1.161841 | 3.323132  | 55 | 6 | 0 | 1.025370  | 0.971288  | -1.709212 |
| 17                    | 6             | 0           | 6.465545                | -0.375517 | -1.518471 | 56 | 6 | 0 | 1.125759  | -3.671629 | 1.259787  |
| 18                    | 6             | 0           | 6.018420                | -0.360885 | 2.142469  | 57 | 6 | 0 | 1.432768  | -1.468566 | 2.282588  |
| 19                    | 6             | 0           | 2.437909                | -1.965596 | 3.112484  | 58 | 6 | 0 | 0.567327  | -0.034777 | 0.554143  |
| 20                    | 6             | 0           | 4.970506                | 0.556046  | 2.193720  | 59 | 6 | 0 | 0.784116  | -2.323576 | 1.309659  |
| 21                    | 6             | 0           | 6.447038                | 0.254620  | -0.202255 | 60 | 6 | 0 | 0.474895  | -1.544568 | 0.135892  |
| 22                    | 6             | 0           | 4.329208                | -5.218761 | 1.483167  | 61 | 6 | 0 | 5.285498  | 2.267542  | -1.197839 |
| 23                    | 6             | 0           | 4.584787                | -5.468158 | -0.960427 | 62 | 6 | 0 | 3.967142  | 2.735247  | 1.414388  |
| 24                    | 6             | 0           | 5.449268                | 0.082077  | -2.482781 | 63 | 6 | 0 | 3.867496  | 3.664849  | 0.175470  |
| 25                    | 6             | 0           | 5.170692                | -4.770758 | -2.092655 | 64 | 7 | 0 | 4.417753  | 3.393520  | -0.946362 |
| 26                    | 6             | 0           | 6.367064                | -2.660309 | -2.538249 | 65 | 6 | 0 | 4.530387  | 3.503450  | 2.632833  |
| 27                    | 6             | 0           | 3.139769                | -5.414296 | -1.103504 | 66 | 6 | 0 | 6.568593  | 2.917593  | -1.762877 |
| 28                    | 6             | 0           | 4.094435                | -4.320005 | -2.951758 | 67 | 8 | 0 | 1.555442  | 2.798173  | 1.645718  |
| 29                    | 6             | 0           | 5.361821                | -2.253236 | -3.397698 | 68 | 8 | 0 | 1.838369  | 3.247017  | -2.137537 |
| 30                    | 6             | 0           | 3.698266                | 0.126551  | 2.768813  | 69 | 6 | 0 | 6.789340  | 3.067907  | -3.133174 |
| 31                    | 6             | 0           | 2.938942                | -5.154473 | 1.342369  | 70 | 6 | 0 | 7.943114  | 3.727219  | -3.553034 |
| 32                    | 6             | 0           | 5.619378                | 1.414602  | 0.011414  | 71 | 6 | 0 | 8.827832  | 4.215628  | -2.592950 |
| 33                    | 6             | 0           | 2.834208                | -4.691508 | -2.323415 | 72 | 6 | 0 | 8.509014  | 4.026751  | -1.247669 |
| 34                    | 6             | 0           | 4.201076                | -3.103064 | -3.620617 | 73 | 7 | 0 | 7.405690  | 3.394649  | -0.833774 |
| 35                    | 6             | 0           | 4.928841                | -0.876362 | -3.375392 | 74 | 6 | 0 | 5.728874  | 4.207649  | 2.457159  |
| 36                    | 6             | 0           | 3.522632                | -0.878264 | -3.677929 | 75 | 6 | 0 | 6.307182  | 4.883140  | 3.529738  |
| 37                    | 6             | 0           | 4.650931                | 1.272086  | -2.186137 | 76 | 6 | 0 | 5.705228  | 4.853398  | 4.789769  |
| 38                    | 6             | 0           | 4.934604                | 1.587873  | 1.181759  | 77 | 6 | 0 | 4.521667  | 4.138425  | 4.970943  |
| 39                    | 6             | 0           | 2.567476                | 2.119013  | 1.718357  | 78 | 6 | 0 | 3.936309  | 3.463675  | 3.897985  |
|                       |               |             |                         |           |           | 79 | 8 | 0 | 1.325158  | 0.788554  | -0.326872 |
|                       |               |             |                         |           |           | 80 | 8 | 0 | -0.271402 | 1.328298  | -1.973532 |
|                       |               |             |                         |           |           | 81 | 8 | 0 | -0.676273 | 0.507086  | 0.867536  |
|                       |               |             |                         |           |           | 82 | 6 | 0 | 3.097188  | 4.952472  | 0.220771  |
|                       |               |             |                         |           |           | 83 | 6 | 0 | 2.481426  | 5.469962  | 1.371788  |
|                       |               |             |                         |           |           | 84 | 6 | 0 | 1.772225  | 6.669132  | 1.328517  |
|                       |               |             |                         |           |           | 85 | 6 | 0 | 1.662007  | 7.382696  | 0.136212  |
|                       |               |             |                         |           |           | 86 | 6 | 0 | 2.277749  | 6.887105  | -1.016028 |
|                       |               |             |                         |           |           | 87 | 6 | 0 | 2.990239  | 5.693755  | -0.972969 |
|                       |               |             |                         |           |           | 88 | 1 | 0 | 6.075182  | 2.676656  | -3.848467 |
|                       |               |             |                         |           |           | 89 | 1 | 0 | 8.146099  | 3.856852  | -4.611947 |
|                       |               |             |                         |           |           | 90 | 1 | 0 | 9.739451  | 4.732398  | -2.874275 |
|                       |               |             |                         |           |           | 91 | 1 | 0 | 9.167944  | 4.398754  | -0.465778 |
|                       |               |             |                         |           |           | 92 | 1 | 0 | 6.214796  | 4.204992  | 1.484704  |
|                       |               |             |                         |           |           | 93 | 1 | 0 | 7.233466  | 5.430247  | 3.380981  |
|                       |               |             |                         |           |           | 94 | 1 | 0 | 6.158014  | 5.379783  | 5.624635  |
|                       |               |             |                         |           |           | 95 | 1 | 0 | 4.048054  | 4.103137  | 5.947522  |
|                       |               |             |                         |           |           | 96 | 1 | 0 | 3.009876  | 2.920762  | 4.053840  |
|                       |               |             |                         |           |           | 97 | 1 | 0 | -0.492965 | 2.203807  | -1.535598 |
|                       |               |             |                         |           |           | 98 | 1 | 0 | -1.344078 | 0.287555  | 0.141211  |
|                       |               |             |                         |           |           | 99 | 1 | 0 | 2.536558  | 4.940948  | 2.309182  |

|     |   |   |           |           |           |     |   |   |            |           |           |
|-----|---|---|-----------|-----------|-----------|-----|---|---|------------|-----------|-----------|
| 100 | 1 | 0 | 1.300489  | 7.039297  | 2.233585  | 162 | 1 | 0 | -3.419703  | 1.116919  | 3.264107  |
| 101 | 1 | 0 | 1.103827  | 8.314104  | 0.104010  | 163 | 1 | 0 | -2.158088  | 1.812574  | 3.776338  |
| 102 | 1 | 0 | 2.202892  | 7.431929  | -1.952805 | 164 | 8 | 0 | -8.191745  | -3.062692 | -2.969201 |
| 103 | 1 | 0 | 3.457599  | 5.298283  | -1.864199 | 165 | 1 | 0 | -8.640812  | -3.698098 | -3.540540 |
| 104 | 8 | 0 | -2.448344 | -0.223422 | -0.836741 | 166 | 1 | 0 | -8.482312  | -2.160249 | -3.310117 |
| 105 | 1 | 0 | -3.402906 | -0.055872 | -0.629459 | 167 | 8 | 0 | -8.770541  | -0.788681 | -4.113736 |
| 106 | 1 | 0 | -2.342506 | -0.114227 | -1.812816 | 168 | 1 | 0 | -7.878288  | -0.452377 | -4.332683 |
| 107 | 8 | 0 | -1.760023 | -4.676899 | 0.984191  | 169 | 1 | 0 | -9.224021  | -0.013575 | -3.716567 |
| 108 | 1 | 0 | -2.627485 | -5.107721 | 1.058899  | 170 | 8 | 0 | -9.859025  | 1.547367  | -3.053403 |
| 109 | 1 | 0 | -1.924836 | -4.056385 | 0.229995  | 171 | 1 | 0 | -10.694510 | 1.800895  | -3.464929 |
| 110 | 8 | 0 | -1.581042 | -3.407661 | 3.359798  | 172 | 1 | 0 | -9.203260  | 2.325161  | -3.255274 |
| 111 | 1 | 0 | -1.495686 | -3.836198 | 2.466331  | 173 | 8 | 0 | -9.451168  | 0.933798  | -0.532951 |
| 112 | 1 | 0 | -1.196937 | -2.514006 | 3.301907  | 174 | 1 | 0 | -9.776122  | 1.216709  | -1.430585 |
| 113 | 8 | 0 | -1.324732 | -0.515844 | 3.460524  | 175 | 1 | 0 | -9.364948  | 1.734889  | 0.041559  |
| 114 | 1 | 0 | -2.270958 | -0.609841 | 3.648231  | 176 | 8 | 0 | -9.854772  | -1.278851 | 0.701044  |
| 115 | 1 | 0 | -1.270417 | -0.175641 | 2.545793  | 177 | 1 | 0 | -10.787870 | -1.499259 | 0.805307  |
| 116 | 8 | 0 | -1.123631 | 3.357719  | 1.592195  | 178 | 1 | 0 | -9.802159  | -0.431330 | 0.158927  |
| 117 | 1 | 0 | -1.818608 | 2.718202  | 1.834375  | 179 | 8 | 0 | -8.174224  | -3.227073 | -0.246370 |
| 118 | 1 | 0 | -0.282316 | 2.890322  | 1.750725  | 180 | 1 | 0 | -8.284251  | -3.305826 | -1.223684 |
| 119 | 8 | 0 | -2.646105 | -2.779924 | -3.660544 | 181 | 1 | 0 | -8.783667  | -2.516000 | 0.051498  |
| 120 | 1 | 0 | -3.615525 | -2.754544 | -3.756847 | 182 | 8 | 0 | -5.454059  | -2.351061 | -3.283123 |
| 121 | 1 | 0 | -2.372746 | -1.847864 | -3.757211 | 183 | 1 | 0 | -6.299570  | -2.819800 | -3.418616 |
| 122 | 8 | 0 | -2.084507 | 0.002209  | -3.528602 | 184 | 1 | 0 | -5.324765  | -2.447825 | -2.304796 |
| 123 | 1 | 0 | -2.702053 | 0.709324  | -3.833010 | 185 | 8 | 0 | -6.141765  | 0.162887  | -3.949159 |
| 124 | 1 | 0 | -1.252362 | 0.459332  | -3.311881 | 186 | 1 | 0 | -6.540238  | 0.489993  | -3.101264 |
| 125 | 8 | 0 | -3.284533 | 3.837431  | -1.996741 | 187 | 1 | 0 | -5.797752  | -0.748468 | -3.742149 |
| 126 | 1 | 0 | -3.335763 | 4.606888  | -2.579536 | 188 | 8 | 0 | -3.969419  | 1.923664  | -3.912558 |
| 127 | 1 | 0 | -2.343737 | 3.818285  | -1.677679 | 189 | 1 | 0 | -4.697940  | 1.288577  | -3.740530 |
| 128 | 8 | 0 | -2.589460 | -2.994182 | -0.923623 | 190 | 1 | 0 | -3.827841  | 2.462636  | -3.105839 |
| 129 | 1 | 0 | -2.522207 | -3.080644 | -1.902796 | 191 | 8 | 0 | -6.924670  | 1.078610  | -1.603328 |
| 130 | 1 | 0 | -2.457074 | -2.039495 | -0.768975 | 192 | 1 | 0 | -7.778776  | 0.824949  | -1.190537 |
| 131 | 8 | 0 | -0.838904 | 3.656820  | -0.946094 | 193 | 1 | 0 | -6.191581  | 0.598920  | -1.113571 |
| 132 | 1 | 0 | 0.007858  | 4.091999  | -1.134500 | 194 | 8 | 0 | -5.015065  | -0.104562 | -0.327861 |
| 133 | 1 | 0 | -0.953506 | 3.591711  | 0.062473  | 195 | 1 | 0 | -5.173039  | -1.095332 | -0.325941 |
| 134 | 8 | 0 | -7.304059 | -4.681533 | 1.881041  | 196 | 1 | 0 | -5.301338  | 0.259006  | 0.550977  |
| 135 | 1 | 0 | -7.763018 | -5.525528 | 1.967058  | 197 | 8 | 0 | -5.523013  | -2.619257 | -0.618400 |
| 136 | 1 | 0 | -7.693439 | -4.234846 | 1.092175  | 198 | 1 | 0 | -6.462757  | -2.803088 | -0.395943 |
| 137 | 8 | 0 | -6.219595 | -3.729095 | 4.354764  | 199 | 1 | 0 | -4.983771  | -3.340775 | -0.191501 |
| 138 | 1 | 0 | -6.755663 | -3.930667 | 3.564382  | 200 | 8 | 0 | -8.869060  | 3.165501  | 0.892840  |
| 139 | 1 | 0 | -6.550721 | -2.886692 | 4.714806  | 201 | 1 | 0 | -9.527314  | 3.873111  | 0.883051  |
| 140 | 8 | 0 | -4.613466 | -4.558129 | 0.971121  | 202 | 1 | 0 | -8.176716  | 3.442322  | 0.196857  |
| 141 | 1 | 0 | -5.478624 | -4.866969 | 1.299507  | 203 | 8 | 0 | -7.658596  | 3.388408  | 3.443168  |
| 142 | 1 | 0 | -4.342028 | -3.898109 | 1.654996  | 204 | 1 | 0 | -8.068589  | 3.292760  | 2.558656  |
| 143 | 8 | 0 | -4.075691 | -2.866945 | 3.007050  | 205 | 1 | 0 | -6.711455  | 3.562120  | 3.257127  |
| 144 | 1 | 0 | -4.735008 | -3.270734 | 3.631454  | 206 | 8 | 0 | -5.042075  | 4.806683  | -0.049580 |
| 145 | 1 | 0 | -3.131906 | -3.131508 | 3.273050  | 207 | 1 | 0 | -4.324685  | 4.423864  | -0.592715 |
| 146 | 8 | 0 | -6.701368 | -0.955680 | 4.743101  | 208 | 1 | 0 | -4.948056  | 4.425720  | 0.851728  |
| 147 | 1 | 0 | -7.175820 | -0.240654 | 5.207665  | 209 | 8 | 0 | -5.101773  | 3.473160  | 2.364163  |
| 148 | 1 | 0 | -7.165776 | -0.945106 | 3.877649  | 210 | 1 | 0 | -5.417163  | 2.589988  | 2.057225  |
| 149 | 8 | 0 | -8.226471 | -0.226211 | 2.602224  | 211 | 1 | 0 | -4.272690  | 3.261850  | 2.835768  |
| 150 | 1 | 0 | -8.909223 | -0.659607 | 2.046429  | 212 | 8 | 0 | -7.182194  | 3.669551  | -0.983682 |
| 151 | 1 | 0 | -8.643823 | 0.333915  | 3.294304  | 213 | 1 | 0 | -6.900920  | 2.744370  | -1.191355 |
| 152 | 8 | 0 | -8.393345 | 1.285481  | 4.785585  | 214 | 1 | 0 | -6.362386  | 4.167785  | -0.663461 |
| 153 | 1 | 0 | -9.099001 | 1.608698  | 5.357723  | 215 | 8 | 0 | -6.389255  | 2.650149  | -5.246370 |
| 154 | 1 | 0 | -8.019814 | 2.106899  | 4.332695  | 216 | 1 | 0 | -6.474377  | 1.683441  | -5.179480 |
| 155 | 8 | 0 | -4.347276 | -0.380331 | 3.519440  | 217 | 1 | 0 | -5.463615  | 2.772194  | -4.966831 |
| 156 | 1 | 0 | -4.228542 | -1.337616 | 3.189186  | 218 | 8 | 0 | -8.303292  | 3.491929  | -3.507373 |
| 157 | 1 | 0 | -5.014289 | -0.486997 | 4.236362  | 219 | 1 | 0 | -7.573421  | 3.256288  | -4.134953 |
| 158 | 8 | 0 | -5.948388 | 0.958608  | 1.869758  | 220 | 1 | 0 | -7.876579  | 3.755747  | -2.664229 |
| 159 | 1 | 0 | -6.876071 | 0.653242  | 2.016195  |     |   |   |            |           |           |
| 160 | 1 | 0 | -5.400332 | 0.443718  | 2.518835  |     |   |   |            |           |           |
| 161 | 8 | 0 | -2.917641 | 1.956077  | 3.194531  |     |   |   |            |           |           |

-----  
The total electronic energy was calculated to be -6525.2969399 Hartree.

**Table S10.** Optimized structure of **1•(H<sub>2</sub>O)<sub>39</sub>-D** (B3LYP-D3/6-31G(d,p))

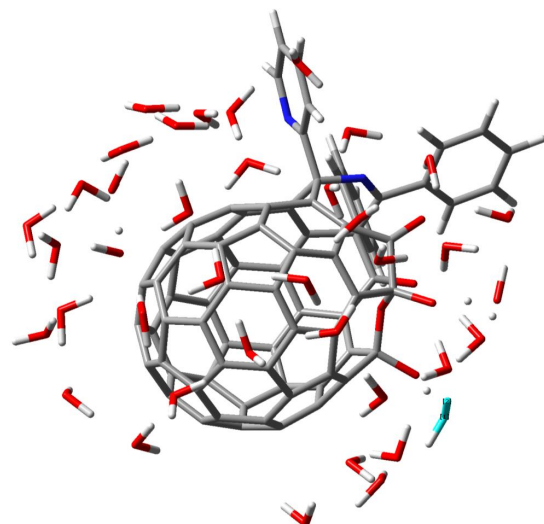

| Center Number | Atomic Number | Atomic Type | Coordinates (Angstroms) |           |           |
|---------------|---------------|-------------|-------------------------|-----------|-----------|
|               |               |             | X                       | Y         | Z         |
| 1             | 6             | 0           | 3.161595                | -1.322119 | -2.699739 |
| 2             | 6             | 0           | 2.041178                | -2.239871 | -2.580860 |
| 3             | 6             | 0           | 1.007615                | -2.181486 | -3.502513 |
| 4             | 6             | 0           | 1.021074                | -1.188058 | -4.564835 |
| 5             | 6             | 0           | 2.072464                | -0.277792 | -4.652199 |
| 6             | 6             | 0           | 3.167203                | -0.349146 | -3.699773 |
| 7             | 6             | 0           | 1.744275                | -2.441981 | -1.174821 |
| 8             | 6             | 0           | -0.346637               | -2.346031 | -3.044456 |
| 9             | 6             | 0           | -0.343394               | -0.745830 | -4.746595 |
| 10            | 6             | 0           | 1.789761                | 1.122736  | -4.916234 |
| 11            | 6             | 0           | 3.570281                | 1.008544  | -3.381558 |
| 12            | 6             | 0           | 3.599149                | -0.990620 | -1.361260 |
| 13            | 6             | 0           | 0.467585                | 1.546889  | -5.085840 |
| 14            | 6             | 0           | -0.621348               | 0.590715  | -5.005138 |
| 15            | 6             | 0           | 0.016517                | 2.772903  | -4.457408 |
| 16            | 6             | 0           | -1.741148               | 1.214700  | -4.329346 |
| 17            | 6             | 0           | 0.419802                | -2.559913 | -0.704532 |
| 18            | 6             | 0           | -1.194174               | -1.478125 | -3.835672 |
| 19            | 6             | 0           | -1.337293               | 2.553697  | -3.989904 |
| 20            | 6             | 0           | -2.337071               | -0.920448 | -3.265357 |
| 21            | 6             | 0           | -0.650963               | -2.559753 | -1.695218 |
| 22            | 6             | 0           | 2.708398                | 1.917695  | -4.119939 |
| 23            | 6             | 0           | 3.986553                | 1.332707  | -2.088670 |
| 24            | 6             | 0           | 0.081843                | -2.027690 | 0.629026  |
| 25            | 6             | 0           | 4.020666                | 0.308727  | -1.057156 |
| 26            | 6             | 0           | 2.754206                | -1.710985 | -0.428827 |
| 27            | 6             | 0           | 3.532240                | 2.566572  | -1.469384 |
| 28            | 6             | 0           | 3.636556                | 0.917105  | 0.202882  |
| 29            | 6             | 0           | 2.427403                | -1.150279 | 0.791451  |
| 30            | 6             | 0           | -2.597710               | 0.501084  | -3.473257 |
| 31            | 6             | 0           | 2.272078                | 3.105984  | -3.522564 |
| 32            | 6             | 0           | -1.997201               | -2.270733 | -1.274472 |
| 33            | 6             | 0           | 3.299458                | 2.308352  | -0.060138 |
| 34            | 6             | 0           | 2.882732                | 0.192157  | 1.125296  |
| 35            | 6             | 0           | 1.093167                | -1.330166 | 1.316134  |
| 36            | 6             | 0           | 0.766229                | -0.136139 | 2.044755  |
| 37            | 6             | 0           | -1.311121               | -1.759606 | 0.970355  |
| 38            | 6             | 0           | -2.833789               | -1.518639 | -2.049352 |
| 39            | 6             | 0           | -4.256289               | 0.455865  | -1.574749 |
| 40            | 6             | 0           | 1.808879                | 0.830367  | 1.857229  |
| 41            | 6             | 0           | 1.435521                | 2.144746  | 1.550278  |
| 42            | 6             | 0           | 0.041588                | 2.542636  | 1.482359  |
| 43            | 6             | 0           | 2.198942                | 2.887202  | 0.577769  |
| 44            | 6             | 0           | 0.895648                | 3.528420  | -3.682665 |
| 45            | 6             | 0           | -2.844144               | 0.195716  | 1.921953  |
| 46            | 6             | 0           | 2.682400                | 3.428914  | -2.164440 |
| 47            | 6             | 0           | 1.548102                | 4.034781  | -1.485113 |
| 48            | 6             | 0           | -1.614062               | -0.626655 | 1.721749  |
| 49            | 6             | 0           | -3.235133               | 1.197176  | -2.364500 |
| 50            | 6             | 0           | -2.719415               | 2.428203  | -1.963177 |
| 51            | 6             | 0           | -0.552783               | 0.276268  | 2.089925  |
| 52            | 6             | 0           | -0.925630               | 1.646129  | 1.890226  |
| 53            | 6             | 0           | 1.278627                | 3.728918  | -0.150277 |
| 54            | 6             | 0           | -0.078255               | 3.496563  | 0.342541  |
| 55            | 6             | 0           | -2.427851               | 1.716773  | 1.703834  |
| 56            | 6             | 0           | 0.453179                | 4.094468  | -2.415575 |
| 57            | 6             | 0           | -1.756779               | 3.088224  | -2.770464 |
| 58            | 6             | 0           | -2.577034               | 2.983834  | -0.506976 |
| 59            | 6             | 0           | -0.832668               | 3.840338  | -1.944387 |
| 60            | 6             | 0           | -1.128640               | 3.575795  | -0.560251 |
| 61            | 6             | 0           | -2.351169               | -2.560247 | 0.168829  |
| 62            | 6             | 0           | -4.224231               | -1.101514 | -1.610274 |
| 63            | 6             | 0           | -4.569238               | -1.676587 | -0.210473 |
| 64            | 7             | 0           | -3.703811               | -2.228197 | 0.548331  |
| 65            | 6             | 0           | -5.192362               | -1.664953 | -2.676577 |
| 66            | 6             | 0           | -2.283628               | -4.077094 | 0.451230  |
| 67            | 8             | 0           | -5.144051               | 1.042092  | -0.975256 |
| 68            | 8             | 0           | -3.950054               | -0.117767 | 2.316639  |
| 69            | 6             | 0           | -1.945417               | -4.570189 | 1.709859  |
| 70            | 6             | 0           | -2.013070               | -5.948763 | 1.915176  |
| 71            | 6             | 0           | -2.417289               | -6.767904 | 0.862800  |
| 72            | 6             | 0           | -2.734528               | -6.174511 | -0.358740 |
| 73            | 7             | 0           | -2.673991               | -4.852691 | -0.570699 |
| 74            | 6             | 0           | -5.281237               | -3.059456 | -2.788034 |
| 75            | 6             | 0           | -6.110592               | -3.632662 | -3.749268 |
| 76            | 6             | 0           | -6.849841               | -2.823812 | -4.615817 |
| 77            | 6             | 0           | -6.751590               | -1.436567 | -4.515963 |
| 78            | 6             | 0           | -5.925049               | -0.857598 | -3.550602 |
| 79            | 8             | 0           | -2.767725               | 1.846026  | 0.306414  |
| 80            | 8             | 0           | -3.054910               | 2.573393  | 2.533063  |
| 81            | 8             | 0           | -3.488302               | 4.013841  | -0.274018 |
| 82            | 6             | 0           | -5.967763               | -1.656122 | 0.340978  |
| 83            | 6             | 0           | -7.053252               | -0.986148 | -0.244755 |
| 84            | 6             | 0           | -8.320515               | -1.025803 | 0.341416  |
| 85            | 6             | 0           | -8.537039               | -1.745652 | 1.518184  |
| 86            | 6             | 0           | -7.468589               | -2.431296 | 2.104370  |
| 87            | 6             | 0           | -6.206706               | -2.389552 | 1.521649  |
| 88            | 1             | 0           | -1.620033               | -3.898623 | 2.497079  |
| 89            | 1             | 0           | -1.730007               | -6.357368 | 2.879256  |
| 90            | 1             | 0           | -2.473123               | -7.845338 | 0.976552  |
| 91            | 1             | 0           | -3.044004               | -6.780118 | -1.207607 |
| 92            | 1             | 0           | -4.685017               | -3.690460 | -2.132953 |
| 93            | 1             | 0           | -6.175213               | -4.713981 | -3.824114 |
| 94            | 1             | 0           | -7.494348               | -3.272501 | -5.365478 |
| 95            | 1             | 0           | -7.318001               | -0.798544 | -5.187665 |

|     |   |   |           |           |           |     |   |   |           |           |           |
|-----|---|---|-----------|-----------|-----------|-----|---|---|-----------|-----------|-----------|
| 96  | 1 | 0 | -5.870230 | 0.223883  | -3.479437 | 160 | 1 | 0 | 6.948590  | 2.312042  | -2.429039 |
| 97  | 1 | 0 | -4.429644 | 2.743842  | 2.388482  | 161 | 8 | 0 | 7.083398  | -3.791577 | -1.818836 |
| 98  | 1 | 0 | -3.162370 | 4.745109  | 0.440346  | 162 | 1 | 0 | 7.325911  | -2.851951 | -1.739583 |
| 99  | 1 | 0 | -6.923194 | -0.421534 | -1.153170 | 163 | 1 | 0 | 6.466474  | -3.965298 | -1.082618 |
| 100 | 1 | 0 | -9.140866 | -0.495211 | -0.132412 | 164 | 8 | 0 | 1.231670  | -4.842233 | 2.166755  |
| 101 | 1 | 0 | -9.524119 | -1.775947 | 1.969560  | 165 | 1 | 0 | 1.510696  | -3.965139 | 2.525672  |
| 102 | 1 | 0 | -7.618601 | -2.997617 | 3.018185  | 166 | 1 | 0 | 0.727382  | -5.223703 | 2.926411  |
| 103 | 1 | 0 | -5.377625 | -2.923413 | 1.968753  | 167 | 8 | 0 | -0.216634 | -5.416447 | 4.402574  |
| 104 | 8 | 0 | -2.882228 | 5.847669  | 1.233514  | 168 | 1 | 0 | 0.343338  | -5.548589 | 5.176683  |
| 105 | 1 | 0 | -2.526924 | 5.607029  | 2.152062  | 169 | 1 | 0 | -0.616708 | -4.512679 | 4.512359  |
| 106 | 1 | 0 | -2.271569 | 6.463591  | 0.794026  | 170 | 8 | 0 | -1.094485 | -2.903489 | 4.395150  |
| 107 | 8 | 0 | 6.269918  | 3.175580  | 1.086194  | 171 | 1 | 0 | -1.950056 | -2.466338 | 4.608005  |
| 108 | 1 | 0 | 5.480033  | 3.145282  | 1.685446  | 172 | 1 | 0 | -0.409217 | -2.295100 | 4.736714  |
| 109 | 1 | 0 | 6.857880  | 3.845682  | 1.459217  | 173 | 8 | 0 | 0.610745  | -5.641745 | -0.348157 |
| 110 | 8 | 0 | -1.130859 | 6.900397  | -0.693683 | 174 | 1 | 0 | 0.600026  | -5.283868 | 0.566415  |
| 111 | 1 | 0 | -0.410647 | 7.330197  | -1.198087 | 175 | 1 | 0 | -0.166332 | -5.238369 | -0.751128 |
| 112 | 1 | 0 | -1.787711 | 6.572990  | -1.349590 | 176 | 8 | 0 | 3.147872  | -5.274517 | -1.240158 |
| 113 | 8 | 0 | 1.423921  | 7.437023  | -1.625408 | 177 | 1 | 0 | 3.157233  | -5.384329 | -2.222143 |
| 114 | 1 | 0 | 1.573339  | 6.638743  | -2.148812 | 178 | 1 | 0 | 2.198487  | -5.326360 | -0.981509 |
| 115 | 1 | 0 | 1.609909  | 7.148761  | -0.711081 | 179 | 8 | 0 | 2.283560  | -2.877150 | 3.589167  |
| 116 | 8 | 0 | -6.118470 | 3.455458  | -0.034018 | 180 | 1 | 0 | 1.788172  | -2.242948 | 4.154487  |
| 117 | 1 | 0 | -5.243447 | 3.844752  | -0.253433 | 181 | 1 | 0 | 3.045422  | -2.368044 | 3.237358  |
| 118 | 1 | 0 | -6.038524 | 2.584931  | -0.463061 | 182 | 8 | 0 | 1.626353  | 0.494009  | 7.129420  |
| 119 | 8 | 0 | 7.118450  | -0.918230 | -1.689499 | 183 | 1 | 0 | 2.497414  | 0.911364  | 6.845116  |
| 120 | 1 | 0 | 7.345767  | 0.023424  | -1.910349 | 184 | 1 | 0 | 1.617579  | 0.512037  | 8.093190  |
| 121 | 1 | 0 | 6.493548  | -0.889911 | -0.945564 | 185 | 8 | 0 | 0.926448  | 6.498779  | 0.998856  |
| 122 | 8 | 0 | -2.035592 | 4.938639  | 3.490933  | 186 | 1 | 0 | 0.084177  | 6.360545  | 0.506564  |
| 123 | 1 | 0 | -1.052059 | 5.018725  | 3.558496  | 187 | 1 | 0 | 0.758296  | 7.289862  | 1.530933  |
| 124 | 1 | 0 | -2.236331 | 4.022246  | 3.216217  | 188 | 8 | 0 | 4.723761  | -1.853433 | 3.170594  |
| 125 | 8 | 0 | -2.618503 | 1.464399  | 4.905239  | 189 | 1 | 0 | 4.945161  | -2.749582 | 3.534154  |
| 126 | 1 | 0 | -2.854782 | 1.924340  | 4.046889  | 190 | 1 | 0 | 5.177523  | -1.782684 | 2.304445  |
| 127 | 1 | 0 | -3.110120 | 1.934778  | 5.591196  | 191 | 8 | 0 | 0.890066  | -1.144997 | 5.102887  |
| 128 | 8 | 0 | 0.620138  | 5.333275  | 3.505129  | 192 | 1 | 0 | 0.584281  | -0.285836 | 4.742500  |
| 129 | 1 | 0 | 0.904240  | 5.455324  | 2.583273  | 193 | 1 | 0 | 1.215270  | -0.885979 | 5.990454  |
| 130 | 1 | 0 | 1.214068  | 4.671577  | 3.911966  | 194 | 8 | 0 | 4.363602  | 2.857259  | 2.967077  |
| 131 | 8 | 0 | -5.489708 | 2.922289  | 2.368744  | 195 | 1 | 0 | 4.567653  | 1.934556  | 3.310536  |
| 132 | 1 | 0 | -5.972757 | 2.071193  | 2.622116  | 196 | 1 | 0 | 4.585977  | 3.433214  | 3.712499  |
| 133 | 1 | 0 | -5.788623 | 3.173811  | 1.414137  | 197 | 8 | 0 | 3.730509  | 1.782000  | 6.251580  |
| 134 | 8 | 0 | 6.000737  | -1.670279 | 0.747349  | 198 | 1 | 0 | 3.221196  | 2.400639  | 5.685192  |
| 135 | 1 | 0 | 5.463900  | -2.453720 | 0.379452  | 199 | 1 | 0 | 4.333717  | 1.308678  | 5.644748  |
| 136 | 1 | 0 | 6.895331  | -2.022634 | 0.863569  | 200 | 8 | 0 | -6.562360 | 0.637862  | 2.932107  |
| 137 | 8 | 0 | 4.900240  | -3.832259 | 0.009113  | 201 | 1 | 0 | -5.760576 | 0.116108  | 2.757202  |
| 138 | 1 | 0 | 4.638398  | -4.377641 | 0.787955  | 202 | 1 | 0 | -7.215384 | 0.302378  | 2.300510  |
| 139 | 1 | 0 | 4.216739  | -4.147987 | -0.650858 | 203 | 8 | 0 | -3.151101 | 5.958793  | -2.281361 |
| 140 | 8 | 0 | 5.151436  | 0.629767  | 4.086851  | 204 | 1 | 0 | -3.462062 | 5.262538  | -1.669026 |
| 141 | 1 | 0 | 4.843568  | -0.289327 | 3.891555  | 205 | 1 | 0 | -2.930656 | 5.487698  | -3.093965 |
| 142 | 1 | 0 | 6.005454  | 0.662431  | 3.586595  | 206 | 8 | 0 | 6.964644  | 0.649208  | 2.094056  |
| 143 | 8 | 0 | 4.602521  | -4.409319 | 3.996934  | 207 | 1 | 0 | 6.887458  | 1.515105  | 1.647900  |
| 144 | 1 | 0 | 4.570180  | -5.031366 | 3.247309  | 208 | 1 | 0 | 6.461827  | 0.038567  | 1.530434  |
| 145 | 1 | 0 | 3.667148  | -4.165965 | 4.132178  | 209 | 8 | 0 | 6.145706  | -0.866944 | -4.229052 |
| 146 | 8 | 0 | 3.747502  | -5.695606 | 1.605089  | 210 | 1 | 0 | 6.404053  | -1.000245 | -3.284102 |
| 147 | 1 | 0 | 3.706651  | -6.139935 | 0.741663  | 211 | 1 | 0 | 6.975157  | -0.982629 | -4.712053 |
| 148 | 1 | 0 | 2.806472  | -5.466291 | 1.813908  | 212 | 8 | 0 | -3.335555 | -1.370804 | 4.763848  |
| 149 | 8 | 0 | 5.026358  | -3.379616 | -3.585185 | 213 | 1 | 0 | -3.086471 | -0.434802 | 4.888563  |
| 150 | 1 | 0 | 5.304775  | -2.586017 | -4.074620 | 214 | 1 | 0 | -3.746152 | -1.373476 | 3.886290  |
| 151 | 1 | 0 | 5.809067  | -3.644544 | -3.048518 | 215 | 8 | 0 | 2.079057  | 3.189790  | 4.483897  |
| 152 | 8 | 0 | 3.071849  | -5.150381 | -3.956044 | 216 | 1 | 0 | 1.288018  | 2.601108  | 4.570479  |
| 153 | 1 | 0 | 2.310831  | -4.565095 | -4.061048 | 217 | 1 | 0 | 2.544938  | 2.920125  | 3.672448  |
| 154 | 1 | 0 | 3.843194  | -4.529956 | -3.977440 | 218 | 8 | 0 | 0.111260  | 1.472038  | 5.070054  |
| 155 | 8 | 0 | 6.355507  | 3.771226  | -1.627189 | 219 | 1 | 0 | -0.870375 | 1.565124  | 5.064972  |
| 156 | 1 | 0 | 5.475204  | 4.031325  | -1.924717 | 220 | 1 | 0 | 0.403743  | 1.314714  | 5.993266  |
| 157 | 1 | 0 | 6.236751  | 3.542028  | -0.681959 |     |   |   |           |           |           |
| 158 | 8 | 0 | 7.281816  | 1.469749  | -2.814092 |     |   |   |           |           |           |
| 159 | 1 | 0 | 6.637131  | 1.192232  | -3.481360 |     |   |   |           |           |           |

-----  
The total electronic energy was calculated to be -6525.2291263 Hartree.



## 5 Microscope Images

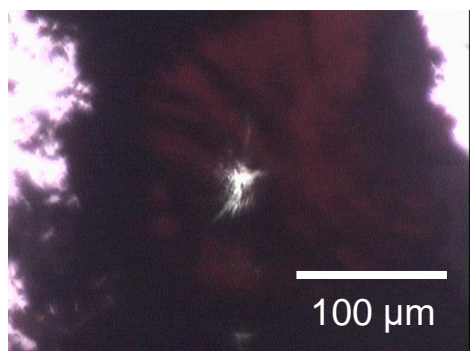

**1**

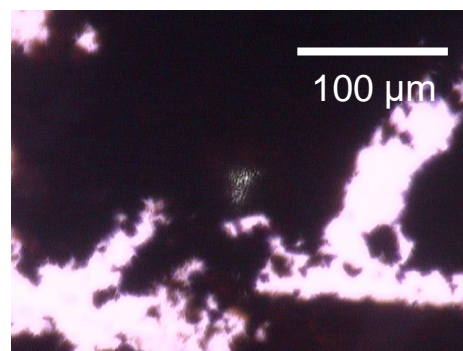

**H<sub>2</sub>O@1**

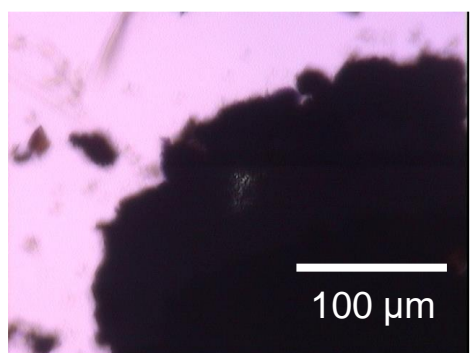

**H<sub>2</sub>O@2**

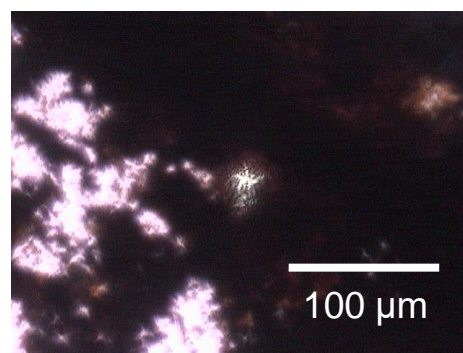

**H<sub>2</sub>O@3**

**Figure S12.** Microscope images of powdery [60]fullerenol samples used for synchrotron IR measurements.

## 6. References

- (1) (a) Y. Hashikawa, K. Kizaki, T. Hirose and Y. Murata, *RSC Adv.*, 2020, **10**, 40406–40410; (b) Y. Hashikawa, S. Hasegawa and Y. Murata, *Org. Lett.*, 2021, **23**, 3854–3858; (c) Y. Hashikawa, K. Kizaki and Y. Murata, *Chem. Commun.*, 2021, **57**, 5322–5325.
- (2) (a) T. Lu and F. Chen, *J. Comput. Chem.*, 2012, **33**, 580–592; (b) T. Lu and Q. Chen, *Theor. Chem. Acc.*, 2020, **139**, 25.
- (3) W. Humphrey, A. Dalke and K. Schulten, *J. Mol. Graphics*, 1996, **14**, 33–38.
- (4) S. R. Varanasi, O. A. Guskova, A. John and J.-U. Sommer, *J. Chem. Phys.*, 2015, **142**, 224308.
